# Supplementary material
Source: HighWire-hosted journal article supplement (https://tobaccocontrol.bmj.com/content/32/4/489)
Supplement: inline-supplementary-material-1 [file inline-supplementary-material-1.pdf]

## Inequity in Smoking Cessation Clinical Trials Testing Pharmacotherapies: Exclusion of Smokers with Mental Health Disorders

Saki R. Talukder<sup>a\*</sup>, Julia M. Lappin<sup>b,ii</sup>, Veronica C. Boland<sup>l</sup>, Hayden McRobbie<sup>l</sup>, Ryan J. Courtney<sup>i</sup>

### Supplementary material

| Contents                                                                                                                                             | Page number |
|------------------------------------------------------------------------------------------------------------------------------------------------------|-------------|
| Figure 1. Decision tree to guide MHD population exclusion/inclusion data extraction                                                                  | 1           |
| Search strategy                                                                                                                                      | 2           |
| Table 1: Smoking cessation medication contraindications and warnings/precautions relating to mental illness                                          | 2-4         |
| Table 2: Cochrane reviews included in this review to identify RCTs on smoking cessation using pharmacotherapies and RCTs within the Cochrane reviews | 4-5         |
| Table 3: Number of included RCTs by the medication being tested                                                                                      | 5           |
| Table 4: RCTs included in this review grouped by medication type                                                                                     | 6-24        |

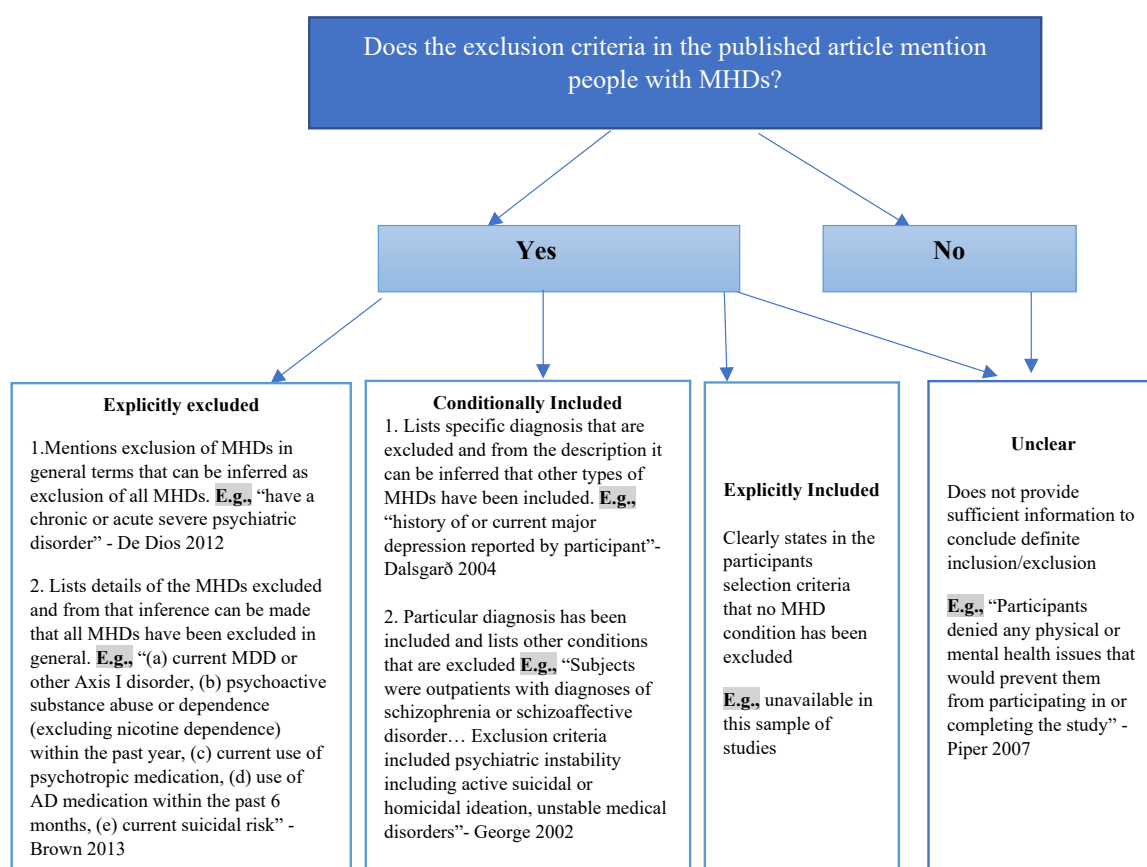

**Figure 1:** Decision tree to guide MHD population exclusion/inclusion data extraction

**Search strategy**

- Identifying all Cochrane reviews on smoking cessation: following search terms were used to identify reviews only on the Cochrane Database of Systematic Reviews without any time limits or filters
  - “quit smoking”, “smoking cessation”, “smoking cessation treatment”, “smoking abstinence”, “smoking abstinence”, “cigarette smoking”, “tobacco use cessation”
- This search identified 506 reviews, 371 duplicated were removed, and further 62 were excluded as “smoking cessation” was not the focus of review. Based on literature pharmacotherapies used for smoking cessation were identified (table 2 in this document), and 60 reviews were excluded as they were not specifically on any of the identified pharmacotherapies for smoking cessation.
- RCTs included within the remaining 13 Cochrane Reviews were checked against the inclusion/exclusion criteria of this review and out of 356 RCTs 279 were included. The PRISMA flow diagram (Figure 1 in main document) provides further details.

Table 1: Smoking cessation medication contraindications and warnings/precautions relating to mental illness

| Group of medication                                             | Name of medication | Contraindications and/or warnings and precautions listed in product summary that relate to mental illness                                                                                                                                                                                                                                                                                                                                                                                                                                                                                                                                                                                                                                                                                                                                                                                                                                                                         |
|-----------------------------------------------------------------|--------------------|-----------------------------------------------------------------------------------------------------------------------------------------------------------------------------------------------------------------------------------------------------------------------------------------------------------------------------------------------------------------------------------------------------------------------------------------------------------------------------------------------------------------------------------------------------------------------------------------------------------------------------------------------------------------------------------------------------------------------------------------------------------------------------------------------------------------------------------------------------------------------------------------------------------------------------------------------------------------------------------|
| Antidepressants (Atypical antidepressants)                      | Bupropion          | <p>Contraindications</p> <ul style="list-style-type: none"> <li>• Undergoing abrupt withdrawal of alcohol or other medicinal products that are associated with an increased risk of seizure on withdrawal (e.g., benzodiazepines)</li> <li>• Current or previous diagnosis of bulimia or anorexia nervosa</li> <li>• Concomitant use of monoamine oxidase inhibitors</li> <li>• History of bipolar disorder</li> </ul> <p>Special warnings</p> <ul style="list-style-type: none"> <li>• Bupropion should be used with caution in people taking medication that are known to lower seizure threshold. This includes most antidepressant and antipsychotic medications</li> <li>• Care should be taken when using bupropion in people with a history of mental illness, due to the greater possibility of neuropsychiatric events</li> </ul> <p>Source: <a href="https://www.medicines.org.uk/emc/medicine/2948/#gref">https://www.medicines.org.uk/emc/medicine/2948/#gref</a></p> |
| Antidepressants (Atypical antidepressants)                      | Venlafaxine        | <p>Contraindications</p> <ul style="list-style-type: none"> <li>• None reported</li> </ul> <p>Special warning</p> <ul style="list-style-type: none"> <li>• Venlafaxine should be used with caution in people who have a history of, or if someone in their family has had, mania or bipolar disorder, aggressive behaviour</li> </ul> <p>Source: <a href="https://www.medicines.org.uk/emc/product/4487/pil#gref">https://www.medicines.org.uk/emc/product/4487/pil#gref</a></p>                                                                                                                                                                                                                                                                                                                                                                                                                                                                                                  |
| Antidepressants Selective serotonin reuptake inhibitors (SSRIs) | Fluoxetine         | <p>Contraindications</p> <ul style="list-style-type: none"> <li>• Concomitant use of non-selective monoamine oxidase inhibitors</li> </ul> <p>Special warnings</p> <ul style="list-style-type: none"> <li>• Fluoxetine should be taken with caution in people who suffer from epilepsy or had a fit in the past, as it may increase the likelihood of an epileptic fit</li> <li>• Care should be taken when using fluoxetine in people with a history of mental illness known as mania or hypomania</li> </ul> <p>Source: <a href="https://www.medicines.org.uk/emc/files/pil.5787.pdf">https://www.medicines.org.uk/emc/files/pil.5787.pdf</a></p>                                                                                                                                                                                                                                                                                                                               |
| Antidepressants Selective serotonin reuptake inhibitors (SSRIs) | Paroxetine         | <p>Contraindications</p> <ul style="list-style-type: none"> <li>• Concomitant use of monoamine oxidase inhibitors or have taken them at any time within the last two weeks.</li> <li>• Concomitant use of anti-psychotic medicines called thioridazine or pimozide.</li> </ul> <p>Special warnings:</p> <ul style="list-style-type: none"> <li>• Paroxetine should be taken with caution in people who have epilepsy or history of fits or seizures</li> <li>• Care should be taken in people with history of mania or having a treatment for severe depression called electro convulsive therapy (ECT)</li> <li>• Caution should be followed if taking medicines that may increase the risk of bleeding, including antipsychotics such as perphenazine or clozapine, tricyclic antidepressants, such as clomipramine</li> </ul> <p>Source: <a href="https://www.medicines.org.uk/emc/files/pil.8486.pdf">https://www.medicines.org.uk/emc/files/pil.8486.pdf</a></p>             |
| Antidepressants Selective serotonin reuptake inhibitors (SSRIs) | Sertraline         | <p>Contraindications</p> <ul style="list-style-type: none"> <li>• Concomitant use of monoamine oxidase inhibitors</li> <li>• Concomitant use of monoamine oxidase inhibitors called pimozide (a medicine for mental disorders such as psychosis)</li> </ul> <p>Special warnings:</p> <ul style="list-style-type: none"> <li>• Caution should be taken in people with epilepsy (fit) or a history of seizures</li> <li>• Sertraline should be used with caution in people who have suffered from manic depressive illness (bipolar disorder) or schizophrenia. Also, among people have or have previously had suicidal ideation</li> </ul> <p>Source: <a href="https://www.medicines.org.uk/emc/files/pil.4348.pdf">https://www.medicines.org.uk/emc/files/pil.4348.pdf</a></p>                                                                                                                                                                                                    |

|                                                         |                                         |                                                                                                                                                                                                                                                                                                                                                                                                                                                                                                                                                                                                                                                                                                                                                                                                                                                                                                           |
|---------------------------------------------------------|-----------------------------------------|-----------------------------------------------------------------------------------------------------------------------------------------------------------------------------------------------------------------------------------------------------------------------------------------------------------------------------------------------------------------------------------------------------------------------------------------------------------------------------------------------------------------------------------------------------------------------------------------------------------------------------------------------------------------------------------------------------------------------------------------------------------------------------------------------------------------------------------------------------------------------------------------------------------|
| Antidepressants<br>Tricyclic antidepressants (TCAs)     | Nortriptyline                           | <p>Contraindications</p> <ul style="list-style-type: none"> <li>Suffering from mania (abnormally raised mood)</li> <li>Concomitant use, or have taken in the last two weeks, monoamine oxidase inhibitors</li> </ul> <p>Special warnings:</p> <ul style="list-style-type: none"> <li>Nortriptyline should be taken with caution in people who are suicidal or aggressive, are agitated, overactive or suffer from schizophrenia, and have a history of epilepsy</li> <li>Caution should be followed in people who are undergoing electroconvulsive therapy and had an allergic reaction to another tricyclic antidepressant in the past</li> </ul> <p>Source: <a href="https://www.medicines.org.uk/emc/files/pil.2423.pdf">https://www.medicines.org.uk/emc/files/pil.2423.pdf</a></p>                                                                                                                   |
| Antidepressants<br>Monoamine oxidase inhibitors (MAOIs) | Selegiline                              | <p>Contraindications</p> <ul style="list-style-type: none"> <li>Taking any antidepressants. Antidepressants should be stopped a number of weeks before taking Eldepryl,</li> <li>taking any monoamine oxidase (MAO) inhibitors e.g., the antibiotic linezolid</li> </ul> <p>Special warnings:</p> <ul style="list-style-type: none"> <li>Selegiline (Eldepryl) should be taken with caution if patient is being treated for any mental illness, anxiety or sleep problems</li> <li>Care should be taken in people taking Levodopa, as it can cause agitation and uncontrollable movements.</li> <li>Caution should be followed in people with history of any unusual urges and/or behaviours (such as excessive gambling or excessively sexual behaviour)</li> </ul> <p>Source: <a href="https://www.medicines.org.uk/emc/files/pil.2251.pdf">https://www.medicines.org.uk/emc/files/pil.2251.pdf</a></p> |
| Antidepressants<br>Monoamine oxidase inhibitors (MAOIs) | Moclobemide                             | <p>Contraindications</p> <ul style="list-style-type: none"> <li>Suffering from a severe mental problem that may make you confused, lose contact with reality or become unable to think and judge clearly.</li> <li>Concomitant use or have recently stopped taking any other medicines to treat depression or anxiety, such as fluoxetine, paroxetine or clomipramine.</li> </ul> <p>Special warnings:</p> <ul style="list-style-type: none"> <li>Moclobemide (Manerix) should be taken with caution in people suffering from bipolar disorder or manic depression, or have ever had suicidal ideation</li> </ul> <p>Source: <a href="https://www.medicines.org.uk/emc/files/pil.6661.pdf">https://www.medicines.org.uk/emc/files/pil.6661.pdf</a></p>                                                                                                                                                    |
| Antidepressants<br>Extracts of St. John's wort          | St. John's wort                         | <p>Contraindications</p> <ul style="list-style-type: none"> <li>Diagnosis of depression</li> </ul> <p>Source: <a href="https://www.medicines.org.uk/emc/files/pil.9038.pdf">https://www.medicines.org.uk/emc/files/pil.9038.pdf</a></p>                                                                                                                                                                                                                                                                                                                                                                                                                                                                                                                                                                                                                                                                   |
| Antidepressants<br>Dietary supplement                   | S-Adenosyl-L-Methionine (SAME)          | <p>Contraindications</p> <ul style="list-style-type: none"> <li>Diagnosis of bipolar disorder, as SAME may worsen symptoms of mania)</li> </ul> <p>Special warnings:</p> <ul style="list-style-type: none"> <li>Precautions must be followed among people who are taking Levodopa to treat Parkinson's disease, taking antidepressants, as SAME increase levels of serotonin</li> </ul> <p>Source: <a href="https://files.nccih.nih.gov/s3fs-public/SAMe_08-11-2015.pdf">https://files.nccih.nih.gov/s3fs-public/SAMe_08-11-2015.pdf</a></p>                                                                                                                                                                                                                                                                                                                                                              |
| nAChR partial agonist                                   | Cytisine                                | <p>Contraindications</p> <ul style="list-style-type: none"> <li>None reported</li> </ul> <p>Special warnings:</p> <ul style="list-style-type: none"> <li>Cytisine (Desmoxan) should be taken with caution in people suffering from schizophrenia and epilepsy</li> </ul> <p>Source: <a href="https://ndarc.med.unsw.edu.au/sites/default/files/ndarc/resources/Desmoxan.pdf">https://ndarc.med.unsw.edu.au/sites/default/files/ndarc/resources/Desmoxan.pdf</a></p>                                                                                                                                                                                                                                                                                                                                                                                                                                       |
| nAChR partial agonist                                   | Varenicline                             | <p>Contraindications</p> <ul style="list-style-type: none"> <li>None reported</li> </ul> <p>Special warnings:</p> <ul style="list-style-type: none"> <li>Champix should be taken with caution, as there have been reports of depression, suicidal ideation and behaviour and suicide attempts in patients taking this medication. If someone develops agitation, depressed mood, changes in behaviour after taking CHAMPIX or develop suicidal thoughts or behaviours, should stop taking Champix and contact the doctor immediately for treatment assessment.</li> <li>Care should be taken among people who have experienced seizures or have epilepsy</li> </ul> <p>Source: <a href="https://www.medicines.org.uk/emc/files/pil.266.pdf">https://www.medicines.org.uk/emc/files/pil.266.pdf</a></p>                                                                                                    |
| NRT                                                     | Nicotine Gum                            | <p>Contraindications</p> <ul style="list-style-type: none"> <li>None reported</li> </ul> <p>Special warnings:</p> <ul style="list-style-type: none"> <li>None reported</li> </ul> <p>Source: <a href="https://www.aafp.org/dam/AAFP/documents/patient_care/tobacco/pharmacologic-guide.pdf">https://www.aafp.org/dam/AAFP/documents/patient_care/tobacco/pharmacologic-guide.pdf</a></p>                                                                                                                                                                                                                                                                                                                                                                                                                                                                                                                  |
| NRT                                                     | Nicotine Lozenges and Transdermal Patch | <p>Contraindications</p> <ul style="list-style-type: none"> <li>None reported</li> </ul> <p>Special warnings:</p> <ul style="list-style-type: none"> <li>None reported</li> </ul> <p>Source: <a href="https://www.aafp.org/dam/AAFP/documents/patient_care/tobacco/pharmacologic-guide.pdf">https://www.aafp.org/dam/AAFP/documents/patient_care/tobacco/pharmacologic-guide.pdf</a></p>                                                                                                                                                                                                                                                                                                                                                                                                                                                                                                                  |
| NRT                                                     | Nasal Spray                             | <p>Contraindications</p> <ul style="list-style-type: none"> <li>None reported</li> </ul> <p>Special warnings:</p> <ul style="list-style-type: none"> <li>None reported</li> </ul> <p>Source: <a href="https://www.aafp.org/dam/AAFP/documents/patient_care/tobacco/pharmacologic-guide.pdf">https://www.aafp.org/dam/AAFP/documents/patient_care/tobacco/pharmacologic-guide.pdf</a></p>                                                                                                                                                                                                                                                                                                                                                                                                                                                                                                                  |

|                                            |                                                        |                                                                                                                                                                                                                                                                                                                                                                                                                                                                                                                                                                                                                                                                                       |
|--------------------------------------------|--------------------------------------------------------|---------------------------------------------------------------------------------------------------------------------------------------------------------------------------------------------------------------------------------------------------------------------------------------------------------------------------------------------------------------------------------------------------------------------------------------------------------------------------------------------------------------------------------------------------------------------------------------------------------------------------------------------------------------------------------------|
| NRT                                        | Oral Inhaler                                           | Contraindications <ul style="list-style-type: none"> <li>None reported</li> </ul> Special warnings: <ul style="list-style-type: none"> <li>None reported</li> </ul> Source: <a href="https://www.aafp.org/dam/AAFP/documents/patient_care/tobacco/pharmacologic-guide.pdf">https://www.aafp.org/dam/AAFP/documents/patient_care/tobacco/pharmacologic-guide.pdf</a>                                                                                                                                                                                                                                                                                                                   |
| Opioid antagonist                          | Naltrexone                                             | Contraindications <ul style="list-style-type: none"> <li>Receiving opioid analgesics, currently dependent, in acute opioid withdrawal</li> </ul> Special warnings: <ul style="list-style-type: none"> <li>Precautions must be followed while taking naltrexone in patients with substance abuse with or without concomitant depression, as it may increase the risk of suicide. This risk is not abated by treatment with naltrexone hydrochloride</li> </ul> Source: <a href="https://www.ebs.tga.gov.au/ebs/picmi/picmirepository.nsf/pdf?OpenAgent&amp;id=CP-2013-PI-01168-1">https://www.ebs.tga.gov.au/ebs/picmi/picmirepository.nsf/pdf?OpenAgent&amp;id=CP-2013-PI-01168-1</a> |
| Cannabinoid receptor antagonist            | Rimonabant                                             | Contraindications <ul style="list-style-type: none"> <li>Suffering from major depressive illness and/or taking anti-depressive treatment</li> </ul> Special warnings: <ul style="list-style-type: none"> <li>Rimonabant (Acomplia) should be taken with caution in people with a history of depressive disorders/mood alterations, uncontrolled psychiatric illness, and seizures</li> </ul> Source: <a href="https://www.ema.europa.eu/en/documents/product-information/acomplia-epar-product-information_en.pdf">https://www.ema.europa.eu/en/documents/product-information/acomplia-epar-product-information_en.pdf</a>                                                            |
| Anxiolytics                                | Buspirone<br>Beta-blockers<br>Oxprenolol<br>Metoprolol | Contraindications <ul style="list-style-type: none"> <li>Epilepsy</li> </ul> Special warnings: <ul style="list-style-type: none"> <li>Should be taken with caution in people taking benzodiazepine e.g., nitrazepam or temazepam or another common sedative or hypnotic medicine, or have had drug dependence</li> </ul> Source: <a href="https://www.medicines.org.uk/emc/files/pil.5735.pdf">https://www.medicines.org.uk/emc/files/pil.5735.pdf</a>                                                                                                                                                                                                                                |
|                                            | Diazepam                                               | Contraindications <ul style="list-style-type: none"> <li>Phobic or obsessional states; chronic psychosis, hyperkinesia (paradoxical reactions may occur)</li> <li>depression or those with anxiety and depression as suicide may be precipitated in such patients.</li> </ul> Special warnings: <ul style="list-style-type: none"> <li>Should be taken with caution in people taking alcohol and/or CNS depressants</li> <li>Extreme caution should be used in prescribing diazepam to patients with personality disorders</li> </ul> Source: <a href="https://www.medicines.org.uk/emc/product/4524/smpc#gref">https://www.medicines.org.uk/emc/product/4524/smpc#gref</a>           |
| Nicotine acetylcholine receptor antagonist | Mecamylamine                                           | Contraindications <ul style="list-style-type: none"> <li>None reported</li> </ul> Special warnings: <ul style="list-style-type: none"> <li>None reported</li> </ul> Source: <a href="https://www.emedicinehealth.com/drug-mecamylamine/article_em.htm">https://www.emedicinehealth.com/drug-mecamylamine/article_em.htm</a>                                                                                                                                                                                                                                                                                                                                                           |
| Alpha-agonist hypotensive                  | Clonidine                                              | Contraindications <ul style="list-style-type: none"> <li>None reported</li> </ul> Special warnings: <ul style="list-style-type: none"> <li>Should be taken with caution, as sudden cessation of clonidine treatment has, in some cases, resulted in symptoms such as nervousness, agitation, headache, and tremor accompanied or followed by a rapid rise in blood pressure and elevated catecholamine concentrations in the plasma</li> </ul> Source: <a href="https://www.accessdata.fda.gov/drugsatfda_docs/label/2009/017407s034lbl.pdf">https://www.accessdata.fda.gov/drugsatfda_docs/label/2009/017407s034lbl.pdf</a>                                                          |

Table 2: Cochrane reviews included in this review to identify RCTs on smoking cessation using pharmacotherapies and RCTs within the Cochrane reviews

| Treatment             | 1st Author         | Review Year | Title of Review                             | Number of RCTs included in each Cochrane review (n = 359) | Number of RCTs included in this review from each Cochrane review (n= 279) |
|-----------------------|--------------------|-------------|---------------------------------------------|-----------------------------------------------------------|---------------------------------------------------------------------------|
| Antidepressants       | Hughes, J. R.      | 2014        | Antidepressants for smoking cessation       | 90                                                        | 80                                                                        |
| Anxiolytics           | Hughes, J. R.      | 2000        | Anxiolytics for smoking cessation           | 7                                                         | 5                                                                         |
| Clonidine             | Gourlay, S. G.     | 2004        | Clonidine for smoking cessation             | 6                                                         | 4                                                                         |
| Electronic cigarettes | Hartmann-Boyce, J. | 2016        | Electronic cigarettes for smoking cessation | 24                                                        | 2                                                                         |
| Lobeline              | Stead, L. F.       | 2012        | Lobeline for smoking cessation              | 0                                                         | 0                                                                         |

|                                        |                    |      |                                                                   |     |     |
|----------------------------------------|--------------------|------|-------------------------------------------------------------------|-----|-----|
| Mecamylamine                           | Lancaster, T.      | 1998 | Mecamylamine (a nicotine antagonist) for smoking cessation        | 2   | 2   |
| Nicobrevin                             | Stead, L. F.       | 2006 | Nicobrevin for smoking cessation                                  | 0   | 0   |
| Nicotine receptor partial agonists     | Cahill, K.         | 2016 | Nicotine receptor partial agonists for smoking cessation          | 44  | 39  |
| Nicotine vaccines                      | Hartmann-Boyce, J. | 2012 | Nicotine vaccines for smoking cessation                           | 4   | 4   |
| Nicotine Replacement Therapy           | Hartmann-Boyce, J. | 2018 | Nicotine replacement therapy versus control for smoking cessation | 136 | 120 |
| Opioid antagonists                     | David, S. P.       | 2013 | Opioid antagonists for smoking cessation                          | 8   | 7   |
| Rimonabant                             | Cahill, K.         | 2011 | Cannabinoid type 1 receptor antagonists for smoking cessation     | 3   | 3   |
| Silver acetate                         | Lancaster, T.      | 2012 | Silver Acetate for Smoking Cessation                              | 2   | 2   |
| <b>Search updated in December 2020</b> |                    |      |                                                                   |     |     |
| Antidepressants                        | Howes, S.          | 2020 | Antidepressants for smoking cessation                             | 33  | 11  |

Table 3: Number of included RCTs by the medication being tested

| Group of treatment    | Name of Medication                 | Number of RCTs (n = 279) |
|-----------------------|------------------------------------|--------------------------|
| Antidepressants       | Bupropion                          | 65                       |
|                       | Fluoxetine                         | 6                        |
|                       | Paroxetine                         | 1                        |
|                       | Venlafaxine                        | 1                        |
|                       | Sertraline                         | 1                        |
|                       | Nortriptyline                      | 7                        |
|                       | Selegiline                         | 5                        |
|                       | Moclobemide                        | 1                        |
|                       | St John's-wort                     | 3                        |
|                       | S-Adenosyl methionine (SAME)       | 1                        |
| nAChR partial agonist | Dianicline                         | 1                        |
|                       | Cytisine                           | 4                        |
|                       | Varenicline                        | 34                       |
| NRT                   | Single NRT product                 | 111                      |
|                       | Combination/choice of NRT products | 9                        |
| Other                 | Rimonabant                         | 3                        |
|                       | Silver acetate                     | 2                        |
|                       | Buspirone                          | 3                        |
|                       | Clonidine                          | 4                        |
|                       | Diazepam                           | 1                        |
|                       | Mecamylamine                       | 2                        |
|                       | Beta-blockers                      | 1                        |
|                       | Naltrexone                         | 7                        |
|                       | NEC (nicotine EC)                  | 2                        |
|                       | Nicotine vaccine                   | 4                        |

Table 4: RCTs included in this review grouped by medication type

| Author & Year    | Treatment group | Medication type | Comparison group | Exclusion criteria related to mental illness                                                                                                                                                                                                                                                                                                                                                             | Does the exclusion criteria mention Population with MHDs? | Reviewers' Decision on MHDs exclusion/inclusion based on information provided in published article |
|------------------|-----------------|-----------------|------------------|----------------------------------------------------------------------------------------------------------------------------------------------------------------------------------------------------------------------------------------------------------------------------------------------------------------------------------------------------------------------------------------------------------|-----------------------------------------------------------|----------------------------------------------------------------------------------------------------|
| Ahluwalia 2002   | Antidepressants | Bupropion       | Placebo          | <ul style="list-style-type: none"> <li>current use of psychoactive medication</li> <li>in drug treatment during the past 6 months</li> <li>being treated for depression</li> </ul>                                                                                                                                                                                                                       | Yes                                                       | Conditionally include                                                                              |
| Aubin 2004       | Antidepressants | Bupropion       | Placebo          | <ul style="list-style-type: none"> <li>diagnosis of anorexia nervosa or bulimia, bipolar affective disorder, panic disorder or psychosis</li> <li>recent history of alcohol severe problems</li> <li>substance abuse or dependence</li> <li>current major depression</li> </ul>                                                                                                                          | Yes                                                       | Conditionally include                                                                              |
| Aveyard 2008     | Antidepressants | Nortriptyline   | Placebo          | <ul style="list-style-type: none"> <li>a contraindication or caution to nortriptyline or contraindication to nicotine replacement therapy and those taking a drug that interacted with nortriptyline</li> </ul>                                                                                                                                                                                          | Yes                                                       | Conditionally include                                                                              |
| Berlin 1995      | Antidepressants | Moclobemide     | Placebo          | <ul style="list-style-type: none"> <li>DSM-III-R criteria for psychoactive substance use disorders: alcohol dependence or abuse or drug dependence or abuse (with the exception of nicotine dependence)</li> <li>actual episodes of major depression, dysthymia, anxiety disorders, or psychotic episodes; or if they took antidepressants, anxiolytics</li> </ul>                                       | Yes                                                       | Conditionally include                                                                              |
| Biberman 2003    | Antidepressants | Selegiline      | Placebo          | <ul style="list-style-type: none"> <li>major physical or mental disorder</li> <li>abuse of alcohol or use of illegal drug within the preceding year</li> </ul>                                                                                                                                                                                                                                           | Yes                                                       | Conditionally include                                                                              |
| Blondal 1999     | Antidepressants | Fluoxetine      | Placebo + NRT    | <ul style="list-style-type: none"> <li>current and past (in the preceding 2 years) treatment with an antidepressant were excluded</li> <li>current abuse of alcohol</li> </ul>                                                                                                                                                                                                                           | Yes                                                       | Conditionally include                                                                              |
| Brown 2007       | Antidepressants | Bupropion       | Placebo          | <ul style="list-style-type: none"> <li>current Axis I disorder according to the 4th edition</li> <li>DSM-IV diagnosis of past-year psychoactive substance abuse or dependence</li> <li>current use of psychotropic medication or medication that may interact adversely with bupropion</li> <li>current weekly (or more frequent) psychotherapy</li> <li>eating disorder; or panic disorder."</li> </ul> | Yes                                                       | Explicitly exclude                                                                                 |
| Brown 2013       | Antidepressants | Fluoxetine      | No Placebo       | <ul style="list-style-type: none"> <li>current MDD or other Axis I disorder</li> <li>psychoactive substance abuse or dependence (excluding nicotine dependence) within the past year</li> <li>current use of psychotropic medication,</li> <li>use of AD medication within the past 6 months</li> <li>current suicidal risk</li> </ul>                                                                   | Yes                                                       | Explicitly exclude                                                                                 |
| Cinciripini 2005 | Antidepressants | Venlafaxine     | Placebo          | <ul style="list-style-type: none"> <li>currently taking psychoactive medication</li> <li>current substance abuse, or other psychiatric disorders</li> </ul>                                                                                                                                                                                                                                              | Yes                                                       | Explicitly exclude                                                                                 |
| Cinciripini 2013 | Antidepressants | Bupropion       | Placebo          | <ul style="list-style-type: none"> <li>currently taking psychotropic medication</li> <li>lifetime history of a psychotic disorder</li> </ul>                                                                                                                                                                                                                                                             | Yes                                                       | Explicitly exclude                                                                                 |

|                |                 |               |               |                                                                                                                                                                                                                                                                                                                                                                                                                                                                     |     |                       |
|----------------|-----------------|---------------|---------------|---------------------------------------------------------------------------------------------------------------------------------------------------------------------------------------------------------------------------------------------------------------------------------------------------------------------------------------------------------------------------------------------------------------------------------------------------------------------|-----|-----------------------|
|                |                 |               |               | <ul style="list-style-type: none"> <li>psychiatric hospitalization within the last year</li> <li>current psychiatric disorder (including substance abuse except for smoking)</li> <li>scoring moderate or higher on the suicidality subscale of the Mini-International Neuropsychiatric Interview</li> <li>contraindications to the use of varenicline (e.g., severe renal impairment) or bupropion SR (e.g., history of seizures).”</li> </ul>                     |     |                       |
| Collins 2004   | Antidepressants | Bupropion     | Placebo       | <ul style="list-style-type: none"> <li>currently used psychotropic medications</li> <li>history of Diagnostic and Statistical Manual of Mental Disorders Axis I psychiatric disorder</li> <li>contraindications for bupropion</li> </ul>                                                                                                                                                                                                                            | Yes | Explicitly exclude    |
| Covey 2002     | Antidepressants | Sertraline    | Placebo       | <ul style="list-style-type: none"> <li>use of a psychotropic medication</li> <li>major depression, alcohol or drug dependence, panic disorder, posttraumatic stress disorder, anorexia nervosa, or bulimia nervosa within the past 6 months</li> <li>lifetime diagnosis of bipolar disorder, antisocial or schizotypal personality disorder, severe borderline personality disorder, obsessive-compulsive disorder, or psychosis including schizophrenia</li> </ul> | Yes | Conditionally include |
| Covey 2007     | Antidepressants | Bupropion     | Placebo + NRT | <ul style="list-style-type: none"> <li>use of psychoactive medications</li> <li>psychiatric conditions including current major depressive disorder</li> <li>dependence on alcohol or drugs within the past year</li> <li>life-time history of bipolar disorder or any psychotic illness</li> </ul>                                                                                                                                                                  | Yes | Conditionally include |
| Cox 2012       | Antidepressants | Bupropion     | Placebo       | <ul style="list-style-type: none"> <li>use of psychoactive medications</li> <li>history of alcohol or substance abuse within the past year; current drinking of 14 or more alcoholic drinks per week and/or drinking five or more drinks on one occasion two or more times in the past month</li> <li>history of bulimia or anorexia nervosa</li> </ul>                                                                                                             | Yes | Conditionally include |
| Croghan 2007   | Antidepressants | Bupropion     | Placebo       | <ul style="list-style-type: none"> <li>history of bulimia/anorexia nervosa</li> <li>chemical dependence on any drug other than nicotine in the past year</li> <li>use of antipsychotics, antidepressants</li> </ul>                                                                                                                                                                                                                                                 | Yes | Conditionally include |
| Da Costa 2002  | Antidepressants | Nortriptyline | Placebo       | <ul style="list-style-type: none"> <li>mental deficiency</li> </ul>                                                                                                                                                                                                                                                                                                                                                                                                 | Yes | Conditionally include |
| Dalsgarð 2004  | Antidepressants | Bupropion     | Placebo       | <ul style="list-style-type: none"> <li>history of or current major depression reported by participant</li> </ul>                                                                                                                                                                                                                                                                                                                                                    | Yes | Conditionally include |
| Eisenberg 2013 | Antidepressants | Bupropion     | Placebo       | <ul style="list-style-type: none"> <li>use of anti-depressants, anti-psychotics</li> <li>current diagnosis of major depression (requiring medication), bipolar disease, or dementia</li> <li>history of suicidal events (previous suicide attempt, suicidal ideation) or family history of suicide; History of anorexia nervosa or bulimia</li> <li>use of any illegal drugs in the past year (e.g., opiates, cocaine, heroin)</li> </ul>                           | Yes | Conditionally include |
| Evins 2001     | Antidepressants | Bupropion     | Placebo       | <ul style="list-style-type: none"> <li>acute exacerbation of psychosis</li> <li>active co-morbid substance abuse, or bulimia</li> <li>current but not past major depressive episode</li> </ul>                                                                                                                                                                                                                                                                      | Yes | Conditionally include |
| Evins 2005     | Antidepressants | Bupropion     | Placebo       | <ul style="list-style-type: none"> <li>unstable symptoms and an unstable dose of antipsychotic medication for 30 days</li> <li>meet Diagnostic and Statistical Manual of Mental Disorders</li> <li>history of bulimia, and history of mania or substance abuse disorder other than nicotine or caffeine within 6 months of enrolment</li> </ul>                                                                                                                     | Yes | Conditionally include |
| Evins 2007     | Antidepressants | Bupropion     | Placebo + NRT | <ul style="list-style-type: none"> <li>unstable psychiatric symptoms and antipsychotic dose for 30 days or more</li> </ul>                                                                                                                                                                                                                                                                                                                                          | Yes | Conditionally include |

|                |                 |                           |               |                                                                                                                                                                                                                                                                                                                                                                                                                                                                                                                                                |     |                       |
|----------------|-----------------|---------------------------|---------------|------------------------------------------------------------------------------------------------------------------------------------------------------------------------------------------------------------------------------------------------------------------------------------------------------------------------------------------------------------------------------------------------------------------------------------------------------------------------------------------------------------------------------------------------|-----|-----------------------|
|                |                 |                           |               | <ul style="list-style-type: none"> <li>• current major depressive disorder</li> <li>• substance use disorder other than nicotine or caffeine within 6 months of screening</li> <li>• bulimia</li> </ul>                                                                                                                                                                                                                                                                                                                                        |     |                       |
| Fossati 2007   | Antidepressants | Bupropion                 | Placebo       | <ul style="list-style-type: none"> <li>• use of antidepressants and antipsychotics</li> <li>• a medical history of eating disorders</li> </ul>                                                                                                                                                                                                                                                                                                                                                                                                 | Yes | Conditionally include |
| Gariti 2009    | Antidepressants | Bupropion                 | Placebo + NRT | <ul style="list-style-type: none"> <li>• not in reasonably good health, including being psychiatrically unstable</li> <li>• history of psychosis, mania (Bipolar 1), eating disorder</li> <li>• substance abuse/dependence within the past 6 months or current use of cocaine</li> <li>• current use of an anti-depressant was also exclusionary</li> <li>• Severe anxiety disorders and depressive disorders</li> </ul>                                                                                                                       | Yes | Conditionally include |
| George 2002    | Antidepressants | Bupropion                 | Placebo       | <ul style="list-style-type: none"> <li>• unstable schizophrenia or schizoaffective disorder</li> <li>• not on stable doses of their antipsychotic drugs for at least one month prior to randomization and continued antipsychotic treatment during the trial</li> <li>• evidence of alcohol or illicit drug abuse or dependence in the 3 months prior to screening evaluation</li> <li>• psychiatric instability including active suicidal or homicidal ideation, unstable medical disorders and inability to give informed consent</li> </ul> | Yes | Conditionally include |
| George 2003    | Antidepressants | Selegiline                | Placebo       | <ul style="list-style-type: none"> <li>• lifetime history of schizophrenia, bipolar disorder, panic disorder, and posttraumatic stress disorder were excluded from the trial</li> <li>• past history of major depression</li> <li>• use of antidepressant medications or sympathomimetic agents (e.g., phenylephrine, methylphenidate)</li> <li>• history of alcohol/drug abuse or dependence (except nicotine or caffeine) in the 6 months before study enrolment</li> </ul>                                                                  | Yes | Conditionally include |
| George 2008    | Antidepressants | Bupropion                 | Placebo + NRT | <ul style="list-style-type: none"> <li>• positive urine drug screen, or evidence of alcohol or illicit drug abuse or dependence in the 3 months prior to screening evaluation</li> <li>• history of seizure disorders</li> <li>• psychiatric instability including active suicidal or homicidal ideation, unstable medical disorders and inability to give informed consent</li> </ul>                                                                                                                                                         | Yes | Conditionally include |
| Gonzales 2001  | Antidepressants | Bupropion                 | Placebo       | <ul style="list-style-type: none"> <li>• history of bulimia or anorexia nervosa</li> <li>• had a current diagnosis of major depression</li> </ul>                                                                                                                                                                                                                                                                                                                                                                                              | Yes | Conditionally include |
| Grant 2007     | Antidepressants | Bupropion                 | Placebo + NRT | <ul style="list-style-type: none"> <li>• history of schizophrenia or bipolar affective disorder</li> <li>• current use of any of the following medications: tricyclic antidepressants, monoamine oxidase inhibitors, fluoxetine, antipsychotics, benzodiazepines, protriptyline, theophylline or any investigational drug in the previous four weeks</li> </ul>                                                                                                                                                                                | Yes | Conditionally include |
| Haggström 2006 | Antidepressants | Bupropion & Nortriptyline | Placebo       | <ul style="list-style-type: none"> <li>• serious or unstable clinical or psychiatric disorders (including history of severe depression)</li> <li>• alcohol or any other drug abuse</li> </ul>                                                                                                                                                                                                                                                                                                                                                  | Yes | Conditionally include |
| Hall 1998      | Antidepressants | Nortriptyline             | Placebo       | <ul style="list-style-type: none"> <li>• met the criteria for MDD within 3 months of the baseline were excluded and referred for depression treatment</li> <li>• use of prescribed psychotropic drugs</li> </ul>                                                                                                                                                                                                                                                                                                                               | Yes | Conditionally include |
| Hall 2002      | Antidepressants | Bupropion & Nortriptyline | Placebo       | <ul style="list-style-type: none"> <li>• bulimia</li> <li>• bipolar disease, current major depressive disorder (MDD)</li> </ul>                                                                                                                                                                                                                                                                                                                                                                                                                | Yes | Conditionally include |



|                |                 |               |         |                                                                                                                                                                                                                                                                                                                                                                                                                                                                                                            |     |                       |
|----------------|-----------------|---------------|---------|------------------------------------------------------------------------------------------------------------------------------------------------------------------------------------------------------------------------------------------------------------------------------------------------------------------------------------------------------------------------------------------------------------------------------------------------------------------------------------------------------------|-----|-----------------------|
|                |                 |               |         | <ul style="list-style-type: none"> <li>• treatment for alcohol or other drug use within 6 months</li> <li>• psychiatric hospitalization within 1 year</li> <li>• use of any psychiatric medication</li> <li>• suicidal or psychotic symptoms</li> </ul>                                                                                                                                                                                                                                                    |     |                       |
| Hall 2004      | Antidepressants | Nortriptyline | Placebo | <ul style="list-style-type: none"> <li>• bulimia</li> <li>• bipolar disease, current major depressive disorder (MDD)</li> <li>• treatment for alcohol or other drug use within 6 months</li> <li>• psychiatric hospitalization within 1 year</li> <li>• use of any psychiatric medication</li> <li>• suicidal or psychotic symptoms</li> </ul>                                                                                                                                                             | Yes | Conditionally include |
| Hall 2011      | Antidepressants | Bupropion     | Placebo | <ul style="list-style-type: none"> <li>• lifetime bipolar disorder, current major depression disorder</li> <li>• current use of any psychiatric medication</li> <li>• suicidal or psychotic symptoms</li> <li>• treatment of drug or alcohol use within the prior 6 months</li> <li>• psychiatric hospitalization within the prior year</li> </ul>                                                                                                                                                         | Yes | Conditionally include |
| Hatsukami 2004 | Antidepressants | Bupropion     | Placebo | <ul style="list-style-type: none"> <li>• eating disorders</li> <li>• concurrent drug therapy (e.g., psychoactive drugs, theophylline)</li> <li>• symptoms of depression at the time of enrolment (Beck Depression Inventory score 7 and verified by clinical impression)</li> <li>• history or current diagnosis of other serious psychiatric illness (e.g., panic disorder, psychosis, bipolar disorder)</li> <li>• history of alcohol or other substance abuse in the year before enrolment.”</li> </ul> | Yes | Conditionally include |
| Hays 2001      | Antidepressants | Bupropion     | Placebo | <ul style="list-style-type: none"> <li>• history or current diagnosis of anorexia nervosa or bulimia</li> <li>• presence of an unstable medical or psychiatric condition</li> <li>• current use of psychotropic medications</li> <li>• current use of any behavioural therapy for smoking cessation</li> <li>• current major depression</li> </ul>                                                                                                                                                         | Yes | Conditionally include |
| Hays 2009      | Antidepressants | Bupropion     | Placebo | <ul style="list-style-type: none"> <li>• current diagnosis of anorexia nervosa or bulimia</li> <li>• presence of an unstable medical or psychiatric condition</li> <li>• current use of psychotropic medications</li> <li>• current (within the past 3 months) DSM - IV diagnosis of a major depressive disorder</li> </ul>                                                                                                                                                                                | Yes | Conditionally include |
| Hertzberg 2001 | Antidepressants | Bupropion     | Placebo | <ul style="list-style-type: none"> <li>• use psychotropic medication or an unstable psychotropic regimen (same dosage and drug for at least 6 months before the study).”</li> </ul>                                                                                                                                                                                                                                                                                                                        | Yes | Conditionally include |
| Holt 2005      | Antidepressants | Bupropion     | Placebo | <ul style="list-style-type: none"> <li>• anorexia or bulimia</li> <li>• pregnant or lactating; history of alcohol or drug abuse</li> </ul>                                                                                                                                                                                                                                                                                                                                                                 | Yes | Conditionally include |
| Hurt 1997      | Antidepressants | Bupropion     | Placebo | <ul style="list-style-type: none"> <li>• history or current diagnosis of anorexia nervosa or bulimia</li> <li>• presence of an unstable medical or psychiatric condition</li> <li>• history of dependence on alcohol or a non-nicotine substance within the past year</li> <li>• current use of psychotropic medications</li> <li>• current depression as assessed by the physician</li> </ul>                                                                                                             | Yes | Conditionally include |
| Hurt 2003      | Antidepressants | Bupropion     | Placebo | <ul style="list-style-type: none"> <li>• current (1 month) major psychiatric disorder or use of major psychiatric medications</li> <li>• active alcoholism or drug dependence</li> </ul>                                                                                                                                                                                                                                                                                                                   | Yes | Conditionally include |

|               |                 |            |               |                                                                                                                                                                                                                                                                                                                                                                                                                                                                 |     |                       |
|---------------|-----------------|------------|---------------|-----------------------------------------------------------------------------------------------------------------------------------------------------------------------------------------------------------------------------------------------------------------------------------------------------------------------------------------------------------------------------------------------------------------------------------------------------------------|-----|-----------------------|
|               |                 |            |               | <ul style="list-style-type: none"> <li>• history of anorexia or bulimia</li> </ul>                                                                                                                                                                                                                                                                                                                                                                              |     |                       |
| Jorenby 1999  | Antidepressants | Bupropion  | Placebo       | <ul style="list-style-type: none"> <li>• current diagnosis of major depressive episode or a history of panic disorder, psychosis, bipolar disorder, or eating disorders</li> <li>• abuse of alcohol or a non-nicotine-containing drug within the preceding year</li> <li>• use of a psychoactive drug within the week before enrolment</li> </ul>                                                                                                               | Yes | Conditionally include |
| Jorenby 2006  | Antidepressants | Bupropion  | Placebo       | <ul style="list-style-type: none"> <li>• contraindications for use of bupropion (diagnosis of eating disorder)</li> <li>• serious or unstable disease within the previous 6 months</li> <li>• history of alcohol or other drug abuse or dependence in the previous 12 months (nicotine excepted)</li> <li>• treatment for major depression in the previous 12 months</li> <li>• history of or current panic disorder, psychosis, or bipolar disorder</li> </ul> | Yes | Conditionally include |
| Kahn 2012     | Antidepressants | Selegiline | Placebo       | <ul style="list-style-type: none"> <li>• current diagnosis of major depressive disorder or other neuropsychiatric disorders that required current contraindicated pharmacological treatment</li> </ul>                                                                                                                                                                                                                                                          | Yes | Conditionally include |
| Kalman 2011   | Antidepressants | Bupropion  | Placebo + NRT | <ul style="list-style-type: none"> <li>• diagnosis of schizophrenia</li> <li>• current psychotic episode</li> </ul>                                                                                                                                                                                                                                                                                                                                             | Yes | Conditionally include |
| Killen 2000   | Antidepressants | Paroxetine | Placebo + NRT | <ul style="list-style-type: none"> <li>• history of bipolar disorder, schizophrenia</li> <li>• receiving active treatment for or reported current depression or substance abuse</li> <li>• taking antidepressants, psychotropics, or other drugs that could interact with paroxetine resulting in potentially adverse consequences</li> </ul>                                                                                                                   | Yes | Conditionally include |
| Killen 2004   | Antidepressants | Bupropion  | Placebo + NRT | <ul style="list-style-type: none"> <li>• potential participants received a comprehensive history and physical exam conducted by a study physician and an assessment of past and current depression and current drug use. No further details provided</li> </ul>                                                                                                                                                                                                 | No  | Unclear               |
| Killen 2006   | Antidepressants | Bupropion  | Placebo       | <ul style="list-style-type: none"> <li>• bipolar disorder, schizophrenia</li> <li>• receiving active treatment for or reporting current depression or substance abuse</li> </ul>                                                                                                                                                                                                                                                                                | Yes | Conditionally include |
| Killen 2010   | Antidepressants | Selegiline | Placebo       | <ul style="list-style-type: none"> <li>• bipolar disorder, schizophrenia</li> <li>• active treatment for or reporting current depression or substance abuse</li> <li>• use of medications contraindicated for use with selegiline</li> </ul>                                                                                                                                                                                                                    | Yes | Conditionally include |
| Levine 2010   | Antidepressants | Bupropion  | Placebo       | <ul style="list-style-type: none"> <li>• current major depressive disorder or suicidality</li> <li>• drug or alcohol dependence within the past year</li> <li>• psychotic disorders</li> <li>• use of medications contraindicated with bupropion</li> </ul>                                                                                                                                                                                                     | Yes | Conditionally include |
| McCarthy 2008 | Antidepressants | Bupropion  | Placebo       | <ul style="list-style-type: none"> <li>• bipolar disorder, psychosis, current depression</li> <li>• contraindications to bupropion SR use</li> <li>• history of eating disorders</li> <li>• current heavy drinking</li> </ul>                                                                                                                                                                                                                                   | Yes | Conditionally include |
| Muramoto 2007 | Antidepressants | Bupropion  | Placebo       | <ul style="list-style-type: none"> <li>• history or current diagnosis or treatment of panic disorder, psychosis, bipolar disorder, or eating disorder</li> <li>• substance abuse or dependence in the 3 months preceding the study</li> <li>• current clinical depression or ADHD</li> <li>• any psychoactive drug treatment within 4 weeks of the study treatment phase</li> </ul>                                                                             | Yes | Conditionally include |
| Myles 2004    | Antidepressants | Bupropion  | Placebo       | <ul style="list-style-type: none"> <li>• any medical condition or drug therapy that was considered likely to interact with bupropion</li> </ul>                                                                                                                                                                                                                                                                                                                 | Yes | Conditionally include |

|                |                 |                |         |                                                                                                                                                                                                                                                                                                                                                                                                                                                      |     |                       |
|----------------|-----------------|----------------|---------|------------------------------------------------------------------------------------------------------------------------------------------------------------------------------------------------------------------------------------------------------------------------------------------------------------------------------------------------------------------------------------------------------------------------------------------------------|-----|-----------------------|
|                |                 |                |         | <ul style="list-style-type: none"> <li>major depression or psychosis</li> <li>alcoholism or substance abuse</li> </ul>                                                                                                                                                                                                                                                                                                                               |     |                       |
| Niaura 2002    | Antidepressants | Fluoxetine     | Placebo | <ul style="list-style-type: none"> <li>use of psychotropic medication or current psychiatric illness</li> <li>alcohol or drug abuse in the past year</li> <li>suicidal ideation</li> <li>history of bipolar disorder</li> </ul>                                                                                                                                                                                                                      | Yes | Explicitly exclude    |
| Parsons 2009   | Antidepressants | St John's-wort | Placebo | <ul style="list-style-type: none"> <li>history of an eating disorder</li> <li>severe mental illness</li> <li>regular use of illegal drugs or alcohol dependence within the past 6 months</li> <li>currently depressed or taking antidepressant medication</li> </ul>                                                                                                                                                                                 | Yes | Conditionally include |
| Piper 2007     | Antidepressants | Bupropion      | Placebo | <ul style="list-style-type: none"> <li>any mental health issues that would prevent them from participating in or completing the study. No further details provided</li> </ul>                                                                                                                                                                                                                                                                        | No  | Unclear               |
| Planer 2011    | Antidepressants | Bupropion      | Placebo | <ul style="list-style-type: none"> <li>clinical depression or was prescribed antidepressants</li> <li>had been diagnosed as having anorexia nervosa and/or bulimia</li> </ul>                                                                                                                                                                                                                                                                        | Yes | Conditionally include |
| Prochazka 1998 | Antidepressants | Nortriptyline  | Placebo | <ul style="list-style-type: none"> <li>current major depression or other significant psychiatric disorder</li> <li>alcohol or drug dependence</li> <li>contraindication or allergy to nortriptyline</li> </ul>                                                                                                                                                                                                                                       | Yes | Conditionally include |
| Prochazka 2004 | Antidepressants | Nortriptyline  | Placebo | <ul style="list-style-type: none"> <li>current major depression or other significant psychiatric disorder</li> <li>alcohol or drug dependence</li> <li>contraindication or allergy to nortriptyline</li> </ul>                                                                                                                                                                                                                                       | Yes | Conditionally include |
| Richmond 2013  | Antidepressants | Nortriptyline  | Placebo | <ul style="list-style-type: none"> <li>mental illness (major depressive disorder, bipolar disorder; threats of suicide or repeated deliberate self-harm; current psychotic disorder)</li> <li>current use of antidepressant or antipsychotic medication</li> <li>current major depression</li> </ul>                                                                                                                                                 | Yes | Conditionally include |
| Rigotti 2006   | Antidepressants | Bupropion      | Placebo | <ul style="list-style-type: none"> <li>contraindication to bupropion</li> <li>heavy alcohol use (3 drinks/day)</li> <li>major depression, psychosis</li> </ul>                                                                                                                                                                                                                                                                                       | Yes | Conditionally include |
| Rovina 2009    | Antidepressants | Bupropion      | Placebo | <ul style="list-style-type: none"> <li>history or current diagnosis of anorexia nervosa or bulimia</li> <li>presence of an unstable medical or psychiatric condition</li> <li>history of dependence on alcohol or a non-nicotine substance within the past year</li> <li>current use of psychotropic medications, fluoxetine, clonidine, buspirone or doxepin</li> <li>current depression, as assessed by the psychiatrist of the program</li> </ul> | Yes | Conditionally include |
| Saules 2004    | Antidepressants | Fluoxetine     | Placebo | <ul style="list-style-type: none"> <li>acute psychiatric crisis</li> <li>met criteria for a psychiatric disorder within the past six months</li> <li>currently taking psychiatric medications</li> </ul>                                                                                                                                                                                                                                             | Yes | Explicitly exclude    |
| Schmitz 2007   | Antidepressants | Bupropion      | Placebo | <ul style="list-style-type: none"> <li>anorexia nervosa, or bulimia</li> <li>presence of a current psychiatric disorder or serious medical condition</li> <li>dependence on alcohol or other illicit substances</li> <li>concurrent drug therapy or psychotherapy for smoking cessation</li> </ul>                                                                                                                                                   | Yes | Explicitly exclude    |
| Schnoll 2010   | Antidepressants | Bupropion      | Placebo | <ul style="list-style-type: none"> <li>Axis I psychiatric conditions and medical conditions</li> </ul>                                                                                                                                                                                                                                                                                                                                               | Yes | Explicitly exclude    |
| Siddiqi 2013   | Antidepressants | Bupropion      | Placebo | <ul style="list-style-type: none"> <li>not reported</li> </ul>                                                                                                                                                                                                                                                                                                                                                                                       | No  | Unclear               |
| Simon 2004     | Antidepressants | Bupropion      | Placebo | <ul style="list-style-type: none"> <li>contraindications to bupropion or NRT</li> <li>serious psychiatric illnesses, including major depression</li> </ul>                                                                                                                                                                                                                                                                                           | Yes | Conditionally include |

|                |                 |                              |         |                                                                                                                                                                                                                                                                                                                                                                                                                                                                                                                                                                                                  |     |                       |
|----------------|-----------------|------------------------------|---------|--------------------------------------------------------------------------------------------------------------------------------------------------------------------------------------------------------------------------------------------------------------------------------------------------------------------------------------------------------------------------------------------------------------------------------------------------------------------------------------------------------------------------------------------------------------------------------------------------|-----|-----------------------|
|                |                 |                              |         | <ul style="list-style-type: none"> <li>recent history of alcohol abuse within the prior 3 months</li> </ul>                                                                                                                                                                                                                                                                                                                                                                                                                                                                                      |     |                       |
| Simon 2009     | Antidepressants | Bupropion                    | Placebo | <ul style="list-style-type: none"> <li>contraindications to bupropion</li> <li>serious unstable psychiatric illness (defined by frequent mental health visits or changing psychiatric medication regimens)</li> <li>history of drug abuse within the prior 3 months</li> </ul>                                                                                                                                                                                                                                                                                                                   | Yes | Conditionally include |
| Smith 2009     | Antidepressants | Bupropion                    | NRT     | <ul style="list-style-type: none"> <li>bipolar disorder, psychosis, bulimia, or anorexia nervosa</li> <li>serious thoughts of self-harm in the previous 2 weeks</li> <li>drug or alcohol dependence in the past 6 months</li> </ul>                                                                                                                                                                                                                                                                                                                                                              | Yes | Conditionally include |
| Sood 2010      | Antidepressants | St John's-wort               | Placebo | <ul style="list-style-type: none"> <li>met diagnostic criteria for current major depressive disorder</li> <li>lifetime history of bipolar disorder or schizophrenia</li> <li>currently (past 30 days) using antipsychotic or antidepressant medicines</li> <li>a recent history (past 3 months) of alcohol abuse or dependence</li> <li>a recent history of drug abuse</li> <li>currently taking medications known to interact with SJW including all serotonergic drugs (serotonin reuptake inhibitors, tricyclic antidepressants, tramadol, venlafaxine, tryptophan, and buspirone)</li> </ul> | Yes | Conditionally include |
| Sood 2012      | Antidepressants | S-Adenosyl methionine (SAME) | Placebo | <ul style="list-style-type: none"> <li>clinically significant levels of current depression</li> <li>lifetime diagnosis of bipolar disorder, schizophrenia, or dementia</li> <li>an unstable medical condition</li> <li>currently (past 30 days) using antipsychotics or antidepressants</li> <li>recent history (past 3 months) of alcohol abuse or dependence</li> <li>had a recent history (past 3 months) of drug abuse</li> </ul>                                                                                                                                                            | Yes | Conditionally include |
| Spring 2007    | Antidepressants | Fluoxetine                   | Placebo | <ul style="list-style-type: none"> <li>lifetime history of MDD or as having at least one past episode of MDD</li> <li>currently depressed or an MDD episode within the past 6 months</li> <li>current episode of Axis I disorder (other than nicotine dependence)</li> <li>history of seizures, psychosis, or bipolar disorder</li> <li>use of psychotropic medication within the past month</li> <li>medically unstable conditions</li> </ul>                                                                                                                                                   | Yes | Conditionally include |
| Stapleton 2013 | Antidepressants | Bupropion                    | Placebo | <ul style="list-style-type: none"> <li>contraindication to bupropion or NRT according to the summary of product characteristics (SpC)</li> </ul>                                                                                                                                                                                                                                                                                                                                                                                                                                                 | Yes | Conditionally include |
| Swan 2003      | Antidepressants | Bupropion                    | Placebo | <ul style="list-style-type: none"> <li>current use of medications contraindicated for use with bupropion SR or known to lower seizure threshold</li> <li>history of or current diagnosis of anorexia nervosa or bulimia</li> <li>current depression</li> <li>recent high frequency or binge drinking, abuse of other substances including recreational/street drugs</li> </ul>                                                                                                                                                                                                                   | Yes | Conditionally include |
| Tashkin 2001   | Antidepressants | Bupropion                    | Placebo | <ul style="list-style-type: none"> <li>any serious or unstable medical disorders for which bupropion SR was contraindicated</li> <li>current diagnosis of major depression</li> </ul>                                                                                                                                                                                                                                                                                                                                                                                                            | Yes | Conditionally include |
| Tonnesen 2003  | Antidepressants | Bupropion                    | Placebo | <ul style="list-style-type: none"> <li>psychiatric disease</li> <li>currently depressed, or had a history or current diagnosis of bulimia, anorexia nervosa, panic disorder, psychosis or bipolar disorder</li> </ul>                                                                                                                                                                                                                                                                                                                                                                            | Yes | Conditionally include |
| Tonstad 2003   | Antidepressants | Bupropion                    | Placebo | <ul style="list-style-type: none"> <li>history or current diagnosis of bulimia or anorexia nervosa</li> <li>history or current diagnosis of panic disorder, psychosis, or bipolar disorder</li> <li>current depression</li> </ul>                                                                                                                                                                                                                                                                                                                                                                | Yes | Conditionally include |

|                        |                 |                                                 |               |                                                                                                                                                                                                                                                                                                                                                                                                                                                                                                                                                                                     |     |                       |
|------------------------|-----------------|-------------------------------------------------|---------------|-------------------------------------------------------------------------------------------------------------------------------------------------------------------------------------------------------------------------------------------------------------------------------------------------------------------------------------------------------------------------------------------------------------------------------------------------------------------------------------------------------------------------------------------------------------------------------------|-----|-----------------------|
| Wagena 2005            | Antidepressants | Bupropion & Nortriptyline                       | Placebo       | <ul style="list-style-type: none"> <li>• use of psychoactive medication at the time of assessment</li> <li>• any serious or unstable medical disorders for which bupropion SR or nortriptyline was contraindicated</li> </ul>                                                                                                                                                                                                                                                                                                                                                       | Yes | Conditionally include |
| Weinberger 2010        | Antidepressants | Selegiline                                      | Placebo       | <ul style="list-style-type: none"> <li>• evidence of alcohol or other drug abuse or dependence in the previous 6 months</li> <li>• met DSM-IV criteria for a current diagnosis of major depressive disorder, panic disorder or post-traumatic stress disorder</li> <li>• met DSM-IV criteria for a current or past diagnosis of bipolar disorder or schizophrenia</li> <li>• unstable medical disorders</li> <li>• inability to give informed consent</li> <li>• use of antidepressant medication, or other medications (e.g., meperidine) which might interact with SEL</li> </ul> | Yes | Conditionally include |
| Wittchen 2011          | Antidepressants | Bupropion                                       | Placebo       | <ul style="list-style-type: none"> <li>• current diagnosis of major depressive episode</li> <li>• history of panic disorder, psychosis, bipolar disorder, or eating disorder</li> <li>• abuse of alcohol or a non-nicotine containing drug within the preceding year</li> <li>• concurrent use of tricyclics, selective serotonin re-uptake inhibitors (SSRIs), serotonin- norepinephrine re-uptake inhibitors (SNRIs), neuroleptics or monoamine oxidase (MAO) inhibitors</li> </ul>                                                                                               | Yes | Conditionally include |
| Zellweger 2005         | Antidepressants | Bupropion                                       | Placebo       | <ul style="list-style-type: none"> <li>• history or current diagnosis of bulimia, anorexia nervosa, panic disorder, psychosis, or bipolar disorder</li> <li>• current depression</li> </ul>                                                                                                                                                                                                                                                                                                                                                                                         | Yes | Conditionally include |
| Cinciripini 1995 L + H | Other           | Bupirone                                        | Placebo       | <ul style="list-style-type: none"> <li>• current history of a psychiatric disorder or use of psychotropic medications</li> </ul>                                                                                                                                                                                                                                                                                                                                                                                                                                                    | Yes | Explicitly exclude    |
| Dow 1984               | Other           | Beta-blockers<br>1. Oxprenolol<br>2. Metoprolol | Placebo       | <ul style="list-style-type: none"> <li>• not reported</li> </ul>                                                                                                                                                                                                                                                                                                                                                                                                                                                                                                                    | No  | Unclear               |
| Hao 1988               | Other           | Diazepam                                        | Placebo       | <ul style="list-style-type: none"> <li>• not reported</li> </ul>                                                                                                                                                                                                                                                                                                                                                                                                                                                                                                                    | No  | Unclear               |
| Hilleman 1994          | Other           | Bupirone                                        | NRT           | <ul style="list-style-type: none"> <li>• history of psychiatric illness, alcoholism or drug addiction</li> </ul>                                                                                                                                                                                                                                                                                                                                                                                                                                                                    | Yes | Explicitly exclude    |
| Schneider 1996         | Other           | Bupirone                                        | Placebo       | <ul style="list-style-type: none"> <li>• use of psychoactive drugs, or a history of diagnosed anxiety and depression</li> </ul>                                                                                                                                                                                                                                                                                                                                                                                                                                                     | Yes | Conditionally include |
| Glassman 1988          | Other           | Clonidine                                       | Placebo       | <ul style="list-style-type: none"> <li>• drug or alcohol abuse, schizophrenia, and current major depression</li> </ul>                                                                                                                                                                                                                                                                                                                                                                                                                                                              | Yes | Conditionally include |
| Glassman 1993          | Other           | Clonidine                                       | Placebo       | <ul style="list-style-type: none"> <li>• drug or alcohol abuse, schizophrenia, and current major depression</li> <li>• current use of any antidepressant drug</li> <li>• history of major depressive disorder had to have been free of symptoms for at least 6 months and to have taken no antidepressant medication for at least 6 weeks</li> </ul>                                                                                                                                                                                                                                | Yes | Conditionally include |
| Hilleman 1993          | Other           | Clonidine                                       | Placebo       | <ul style="list-style-type: none"> <li>• unstable disease states</li> <li>• history of psychiatric illness, alcoholism, or drug addiction</li> </ul>                                                                                                                                                                                                                                                                                                                                                                                                                                | Yes | Explicitly exclude    |
| Niaura 1996            | Other           | Clonidine                                       | Placebo       | <ul style="list-style-type: none"> <li>• current treatment for a psychiatric disorder (excluding nicotine dependence)</li> </ul>                                                                                                                                                                                                                                                                                                                                                                                                                                                    | Yes | Explicitly exclude    |
| Bullen 2013            | Other           | NEC (nicotine EC)                               | Placebo       | <ul style="list-style-type: none"> <li>• not reported</li> </ul>                                                                                                                                                                                                                                                                                                                                                                                                                                                                                                                    | No  | Unclear               |
| Caponnetto 2013a       | Other           | NEC (nicotine EC)                               | Placebo       | <ul style="list-style-type: none"> <li>• regular psychotropic medicine use</li> <li>• current or past history of alcohol abuse</li> </ul>                                                                                                                                                                                                                                                                                                                                                                                                                                           | Yes | Conditionally include |
| Rose 1994              | Other           | Mecamylamine + Nicotine patch                   | Placebo + NRT | <ul style="list-style-type: none"> <li>• alcohol or drug abuse</li> <li>• use of psychotropic medications</li> </ul>                                                                                                                                                                                                                                                                                                                                                                                                                                                                | Yes | Explicitly exclude    |

|                   |                       |              |               |                                                                                                                                                                                                                                                                                                                                                                                                                                                                                                                                                     |     |                       |
|-------------------|-----------------------|--------------|---------------|-----------------------------------------------------------------------------------------------------------------------------------------------------------------------------------------------------------------------------------------------------------------------------------------------------------------------------------------------------------------------------------------------------------------------------------------------------------------------------------------------------------------------------------------------------|-----|-----------------------|
| Rose 1996         | Other                 | Mecamylamine | Placebo + NRT | <ul style="list-style-type: none"> <li>not reported</li> </ul>                                                                                                                                                                                                                                                                                                                                                                                                                                                                                      | No  | Unclear               |
| Scharfenberg 1971 | nAChR partial agonist | Cytisine     | Placebo       | <ul style="list-style-type: none"> <li>not reported</li> </ul>                                                                                                                                                                                                                                                                                                                                                                                                                                                                                      | No  | Unclear               |
| Vinnikov 2008     | nAChR partial agonist | Cytisine     | Placebo       | <ul style="list-style-type: none"> <li>serious or unstable disorders</li> <li>contraindication for cytisine use</li> <li>schizophrenia</li> </ul>                                                                                                                                                                                                                                                                                                                                                                                                   | Yes | Conditionally include |
| West 2011         | nAChR partial agonist | Cytisine     | Placebo       | <ul style="list-style-type: none"> <li>diagnosis of a current psychiatric disorder or a medical condition that was contraindicated according to the cytisine label</li> </ul>                                                                                                                                                                                                                                                                                                                                                                       | Yes | Explicitly exclude    |
| Walker 2014       | nAChR partial agonist | Cytisine     | NRT           | <ul style="list-style-type: none"> <li>schizophrenia</li> </ul>                                                                                                                                                                                                                                                                                                                                                                                                                                                                                     | Yes | Conditionally include |
| Tonstad 2011      | nAChR partial agonist | Dianicline   | Placebo       | <ul style="list-style-type: none"> <li>current psychotic disorder or major depressive episode based on DSM-IV</li> </ul>                                                                                                                                                                                                                                                                                                                                                                                                                            | Yes | Conditionally include |
| Anthenelli 2013   | nAChR partial agonist | Varenicline  | Placebo       | <ul style="list-style-type: none"> <li>current or past diagnosis of dementia, schizophrenia, schizoaffective disorder, or other psychotic disorder, bipolar I disorder, bipolar II disorder</li> <li>antisocial, schizotypal, or any other personality disorder severe enough to compromise their ability to comply with the study requirement</li> </ul>                                                                                                                                                                                           | Yes | Conditionally include |
| Aubin 2008        | nAChR partial agonist | Varenicline  | NRT           | <ul style="list-style-type: none"> <li>diagnoses of or treatment for depression or other psychological disorder</li> <li>drug or alcohol dependence within the previous 12 months</li> </ul>                                                                                                                                                                                                                                                                                                                                                        | Yes | Explicitly exclude    |
| Baker 2016        | nAChR partial agonist | Varenicline  | NRT           | <ul style="list-style-type: none"> <li>prior suicide attempts within the last 5 years or current suicidal ideation</li> <li>diagnosis of or treatment for psychoses within the last 10 years</li> <li>moderately severe depression via the Patient Health Questionnaire 18</li> <li>current use of bupropion</li> </ul>                                                                                                                                                                                                                             | Yes | Explicitly exclude    |
| Bolliger 2011     | nAChR partial agonist | Varenicline  | Placebo       | <ul style="list-style-type: none"> <li>diagnosis of, or treatment for, depression during the previous 12 months</li> <li>history of or current psychosis, panic disorder, or bipolar disorder</li> <li>use of bupropion, clonidine, or nortriptyline within the previous 6 months</li> </ul>                                                                                                                                                                                                                                                        | Yes | Conditionally include |
| Carson 2014       | nAChR partial agonist | Varenicline  | No Placebo    | <ul style="list-style-type: none"> <li>acute or pre-existing psychiatric illnesses including depression uncontrolled with medication</li> <li>past history psychosis or suicidal ideation</li> </ul>                                                                                                                                                                                                                                                                                                                                                | Yes | Conditionally include |
| Chengappa 2014    | nAChR partial agonist | Varenicline  | Placebo       | <ul style="list-style-type: none"> <li>history of psychiatric emergency room visits or hospitalization, suicidal attempts, or aggressive or violent acts</li> <li>Comorbid psychiatric condition diagnosed within the last three months was excluded.”</li> </ul>                                                                                                                                                                                                                                                                                   | Yes | Conditionally include |
| Cinciripini 2013  | nAChR partial agonist | Varenicline  | Placebo       | <ul style="list-style-type: none"> <li>currently taking psychotropic medication</li> <li>lifetime history of a psychotic disorder</li> <li>psychiatric hospitalization within the last year</li> <li>current psychiatric disorder (including substance abuse except for smoking)</li> <li>scoring moderate or higher on the suicidality subscale of the Mini-International Neuropsychiatric Interview</li> <li>contraindications to the use of varenicline (e.g., severe renal impairment) or bupropion SR (e.g., history of seizures).”</li> </ul> | Yes | Explicitly exclude    |
| De Dios 2012      | nAChR partial agonist | Varenicline  | Placebo       | <ul style="list-style-type: none"> <li>history of a suicide attempt/s</li> <li>chronic or acute severe psychiatric disorder that will interfere with participation</li> <li>substance dependence other than nicotine dependence.”</li> </ul>                                                                                                                                                                                                                                                                                                        | Yes | Explicitly exclude    |
| Ebbert 2015       | nAChR partial agonist | Varenicline  | Placebo       | <ul style="list-style-type: none"> <li>history of a suicide attempt or suicidal behaviour in the previous 2 years</li> </ul>                                                                                                                                                                                                                                                                                                                                                                                                                        | Yes | Conditionally include |

|                |                       |                           |         |                                                                                                                                                                                                                                                                                                                                                                                                                                                                                                                                                                                                                                                                                      |     |                       |
|----------------|-----------------------|---------------------------|---------|--------------------------------------------------------------------------------------------------------------------------------------------------------------------------------------------------------------------------------------------------------------------------------------------------------------------------------------------------------------------------------------------------------------------------------------------------------------------------------------------------------------------------------------------------------------------------------------------------------------------------------------------------------------------------------------|-----|-----------------------|
|                |                       |                           |         | <ul style="list-style-type: none"> <li>major depressive or anxiety disorder assessed by a physician as severe (lifetime or current) or unstable (ie, medication dose change or exacerbations in the last 6 months)</li> <li>lifetime diagnosis of psychosis, panic disorder, posttraumatic stress disorder, or schizophrenia</li> <li>alcohol or substance abuse in the last 12 months</li> </ul>                                                                                                                                                                                                                                                                                    |     |                       |
| Eisenberg 2016 | nAChR partial agonist | Varenicline               | Placebo | <ul style="list-style-type: none"> <li>excessive alcohol use, current use of marijuana or noncigarette tobacco products</li> <li>history of neuropsychiatric disorders including suicidal attempts or suicidal ideation, family history of suicide, panic disorder, psychosis, bipolar disorder, dementia, bulimia, anorexia</li> <li>recent or recurring depression</li> </ul>                                                                                                                                                                                                                                                                                                      | Yes | Conditionally include |
| Evens 2014     | nAChR partial agonist | Varenicline               | Placebo | <ul style="list-style-type: none"> <li>suicidal or homicidal ideation</li> <li>hospitalization for suicidality in the prior 12 months</li> <li>active substance use disorder, or major depressive episode in the prior 6 months</li> </ul>                                                                                                                                                                                                                                                                                                                                                                                                                                           | Yes | Conditionally include |
| Gonzales 2006  | nAChR partial agonist | Varenicline/<br>Bupropion | Placebo | <ul style="list-style-type: none"> <li>any serious or unstable disease within 6 months</li> <li>major depressive disorder within the past year requiring treatment</li> <li>history of panic disorder, psychosis, bipolar disorder, or eating disorders; alcohol or drug abuse/ dependency within the past year</li> <li>use of clonidine, or nortriptyline within the month prior to enrolment</li> </ul>                                                                                                                                                                                                                                                                           | Yes | Conditionally include |
| Gonzales 2014  | nAChR partial agonist | Varenicline               | Placebo | <ul style="list-style-type: none"> <li>history of a suicide attempt or any suicidal behaviour in the past 2 years or current suicidal ideation</li> <li>self-reported current depression</li> <li>diagnosis of depression or treatment with antidepressants during the previous 12 months recorded in medical history</li> <li>lifetime diagnosis of psychosis, panic disorder, other anxiety disorders, or bipolar disorder</li> <li>active alcohol or substance abuse/dependence (except nicotine) within the past 12 months</li> <li>any severe medical or psychiatric condition or laboratory abnormality that would make the participant inappropriate for the study</li> </ul> | Yes | Conditionally include |
| Jorenby 2006   | nAChR partial agonist | Varenicline               | Placebo | <ul style="list-style-type: none"> <li>contraindications for use of bupropion (e.g., history of seizure, diagnosis of eating disorder)</li> <li>use of a monoamine oxidase inhibitor in the prior 14 days</li> <li>serious or unstable disease within the previous 6 months</li> <li>history of alcohol or other drug abuse or dependence in the previous 12 months</li> <li>treatment for major depression in the previous 12 months</li> <li>history of or current panic disorder, psychosis, or bipolar disorder</li> </ul>                                                                                                                                                       | Yes | Conditionally include |
| Nahvi 2014a    | nAChR partial agonist | Varenicline               | Placebo | <ul style="list-style-type: none"> <li>current major depressive or manic episode</li> <li>current psychotic disorder,</li> <li>past-year suicide attempt or psychiatric hospitalization, or current suicidal ideation with plan or intent</li> </ul>                                                                                                                                                                                                                                                                                                                                                                                                                                 | Yes | Conditionally include |
| Nakamura 2007  | nAChR partial agonist | Varenicline               | Placebo | <ul style="list-style-type: none"> <li>neurologic and psychiatric disorder</li> </ul>                                                                                                                                                                                                                                                                                                                                                                                                                                                                                                                                                                                                | Yes | Explicitly exclude    |

|                |                       |                           |         |                                                                                                                                                                                                                                                                                                                                                                                                                                                                                                                                                                                                    |     |                       |
|----------------|-----------------------|---------------------------|---------|----------------------------------------------------------------------------------------------------------------------------------------------------------------------------------------------------------------------------------------------------------------------------------------------------------------------------------------------------------------------------------------------------------------------------------------------------------------------------------------------------------------------------------------------------------------------------------------------------|-----|-----------------------|
| NCT00828113    | nAChR partial agonist | Varenicline               | Placebo | <ul style="list-style-type: none"> <li>• current or history of psychotic disorder</li> <li>• current major depressive disorder</li> <li>• history of suicidal ideation in the previous 3 months</li> <li>• unstable medical condition</li> </ul>                                                                                                                                                                                                                                                                                                                                                   | Yes | Conditionally include |
| NCT01347112    | nAChR partial agonist | Varenicline               | Placebo | <ul style="list-style-type: none"> <li>• current moderate or severe depression</li> <li>• current non-specific suicidal thoughts, or have a lifetime history of a suicidal attempt</li> <li>• current (past 30 days) major depressive disorder or has a history of another psychiatric disorder such as psychosis or bipolar disorder</li> </ul>                                                                                                                                                                                                                                                   | Yes | Conditionally include |
| Niaura 2008    | nAChR partial agonist | Varenicline               | Placebo | <ul style="list-style-type: none"> <li>• history of psychiatric, pulmonary, renal, or cardiovascular disease</li> <li>• history of depression, panic disorder, psychosis, or bipolar disorder</li> <li>• non-nicotine drug or alcohol dependence within 12 months before study enrolment</li> </ul>                                                                                                                                                                                                                                                                                                | Yes | Explicitly exclude    |
| Nides 2006     | nAChR partial agonist | Varenicline/<br>Bupropion | Placebo | <ul style="list-style-type: none"> <li>• active depression requiring treatment</li> <li>• history of panic disorder, psychosis, bipolar disorder, eating disorders</li> <li>• alcohol or drug abuse/dependency within the previous year</li> </ul>                                                                                                                                                                                                                                                                                                                                                 | Yes | Conditionally include |
| Oncken 2006    | nAChR partial agonist | Varenicline               | Placebo | <ul style="list-style-type: none"> <li>• major depression within the prior year</li> <li>• panic disorder, psychosis, or bipolar disorder</li> <li>• use of bupropion within the previous 3 months</li> <li>• drug or alcohol abuse or dependence within the past year</li> </ul>                                                                                                                                                                                                                                                                                                                  | Yes | Conditionally include |
| Rennard 2012   | nAChR partial agonist | Varenicline               | Placebo | <ul style="list-style-type: none"> <li>• use of bupropion, clonidine, or nortriptyline within the past 3 months</li> <li>• serious or unstable psychiatric disorders in the past 6 months or on the basis of medical history</li> <li>• current depression or depression diagnosed or treated within the past 12 months</li> <li>• history of suicidal ideation or suicidal behaviour in the past 5 years</li> <li>• history of or present psychosis, panic attacks, or anxiety disorders, or bipolar disorder</li> <li>• history of drug (except nicotine) or alcohol abuse/dependence</li> </ul> | Yes | Conditionally include |
| Rigotti 2010   | nAChR partial agonist | Varenicline               | Placebo | <ul style="list-style-type: none"> <li>• diagnosis of depression; treatment with antidepressants in the past year</li> <li>• history of psychosis, panic disorder, or bipolar disorder</li> <li>• drug or alcohol abuse or dependence in the past year</li> <li>• use of bupropion, clonidine, or nortriptyline in the past month.”</li> </ul>                                                                                                                                                                                                                                                     | Yes | Conditionally include |
| Rose 2013      | nAChR partial agonist | Varenicline<br>/Bupropion | NRT     | <ul style="list-style-type: none"> <li>• current psychiatric disease (with the exception of anxiety disorders, OCD and ADHD; Suicidal ideation (within the past 10 years)</li> <li>• lifetime occurrence of attempted suicide</li> <li>• current depression</li> <li>• psychiatric medications including antidepressants, anti-psychotics</li> </ul>                                                                                                                                                                                                                                               | Yes | Conditionally include |
| Steinberg 2011 | nAChR partial agonist | Varenicline               | Placebo | <ul style="list-style-type: none"> <li>• mental illness requiring antipsychotic medications</li> <li>• currently using bupropion, nortriptyline</li> <li>• active substance abuse</li> <li>• deemed clinically unstable</li> </ul>                                                                                                                                                                                                                                                                                                                                                                 | Yes | Conditionally include |
| Tashkin 2011   | nAChR partial agonist | Varenicline               | Placebo | <ul style="list-style-type: none"> <li>• unstable or uncontrolled medical conditions</li> <li>• diagnosis of depression or treatment with antidepressants in the past year</li> <li>• drug or alcohol abuse (other than nicotine) in the past year</li> <li>• history of psychosis, panic disorder, or bipolar disorder</li> </ul>                                                                                                                                                                                                                                                                 | Yes | Conditionally include |



|                          |                       |                                        |         |                                                                                                                                                                                                                                                                                                                                                                                                                             |     |                       |
|--------------------------|-----------------------|----------------------------------------|---------|-----------------------------------------------------------------------------------------------------------------------------------------------------------------------------------------------------------------------------------------------------------------------------------------------------------------------------------------------------------------------------------------------------------------------------|-----|-----------------------|
| Tsai 2007                | nAChR partial agonist | Varenicline                            | Placebo | <ul style="list-style-type: none"> <li>past or present history of a serious or unstable clinical disease requiring treatment including neurologic or psychiatric disorders</li> <li>history of drug (except nicotine) or alcohol abuse</li> </ul>                                                                                                                                                                           | Yes | Explicitly exclude    |
| Tsukahara 2010           | nAChR partial agonist | Varenicline                            | NRT     | <ul style="list-style-type: none"> <li>drug or alcohol dependence</li> <li>psychological disorders</li> </ul>                                                                                                                                                                                                                                                                                                               | Yes | Explicitly exclude    |
| Wang 2009                | nAChR partial agonist | Varenicline                            | Placebo | <ul style="list-style-type: none"> <li>diagnosed with, or treated for, depression during the previous 12 months</li> <li>history of psychosis, panic disorder, bipolar disorder</li> </ul>                                                                                                                                                                                                                                  | Yes | Conditionally include |
| Westergaard 2015         | nAChR partial agonist | Varenicline                            | Placebo | <ul style="list-style-type: none"> <li>not reported</li> </ul>                                                                                                                                                                                                                                                                                                                                                              | No  | Unclear               |
| Williams 2007            | nAChR partial agonist | Varenicline                            | Placebo | <ul style="list-style-type: none"> <li>use of antidepressants, antipsychotic agents, naltrexone</li> </ul>                                                                                                                                                                                                                                                                                                                  | Yes | Conditionally include |
| Williams 2012            | nAChR partial agonist | Varenicline                            | Placebo | <ul style="list-style-type: none"> <li>psychiatric hospitalization</li> <li>serious suicidal ideation/behaviour</li> <li>history of drug or alcohol abuse/dependence</li> </ul>                                                                                                                                                                                                                                             | Yes | Conditionally include |
| Wong 2012                | nAChR partial agonist | Varenicline                            | Placebo | <ul style="list-style-type: none"> <li>psychiatric disorders.”</li> </ul>                                                                                                                                                                                                                                                                                                                                                   | Yes | Explicitly exclude    |
| Cornuz 2008              | Other                 | NIC002 (formerly Nicotine-Qβ)          | Placebo | <ul style="list-style-type: none"> <li>current diagnosis or a history of major depressive episodes, of panic attacks, psychosis, bipolar or eating disorders</li> <li>use of bupropion within 6 months before study enrolment or at the time of screening</li> <li>abuse of alcohol or other recreational drugs</li> <li>use of a psychoactive drug (excluding sleeping pills) within one month before enrolment</li> </ul> | Yes | Conditionally include |
| Hatsukami 2011           | Other                 | NicVAX [3'AmNic-rEPA]                  | Placebo | <ul style="list-style-type: none"> <li>not reported</li> </ul>                                                                                                                                                                                                                                                                                                                                                              | No  | Unclear               |
| NCT00836199 2011         | Other                 | NicVAX [3'AmNic-rEPA]                  | Placebo | <ul style="list-style-type: none"> <li>history of drug or alcohol abuse or dependence within 12 months</li> <li>psychiatric disease</li> </ul>                                                                                                                                                                                                                                                                              | Yes | Explicitly exclude    |
| NCT01102114 2010         | Other                 | NicVAX [3'AmNic-rEPA]                  | Placebo | <ul style="list-style-type: none"> <li>history of drug or alcohol abuse or dependence within 12 months</li> <li>psychiatric disease</li> </ul>                                                                                                                                                                                                                                                                              | Yes | Explicitly exclude    |
| Abelin 1989              | NRT                   | Nicotine patch                         | Placebo | <ul style="list-style-type: none"> <li>not reported</li> </ul>                                                                                                                                                                                                                                                                                                                                                              | No  | Unclear               |
| Ahluwalia 1998           | NRT                   | Nicotine patch                         | Placebo | <ul style="list-style-type: none"> <li>self-reported alcohol or drug dependency</li> </ul>                                                                                                                                                                                                                                                                                                                                  | Yes | Conditionally include |
| Ahluwalia 2006           | NRT                   | Nicotine gum (2 mg),                   | Placebo | <ul style="list-style-type: none"> <li>not reported</li> </ul>                                                                                                                                                                                                                                                                                                                                                              | No  | Unclear               |
| Anthenelli (EAGLES) 2016 | nAChR partial agonist | Varenicline, Bupropion, Nicotine patch | Placebo | <ul style="list-style-type: none"> <li>clinical exacerbation of psychotic, anxiety, mood disorders, Axis I and Axis II disorders in the prior 6 months</li> <li>not on stable treatment (medication and dose) for ≥ 3 months (if on treatment)</li> <li>judged to be at imminent risk of self-injurious or suicidal behaviour</li> </ul>                                                                                    | Yes | Conditionally include |
| Areechon 1988            | NRT                   | Nicotine Gum                           | Placebo | <ul style="list-style-type: none"> <li>not reported</li> </ul>                                                                                                                                                                                                                                                                                                                                                              | No  | Unclear               |
| Blondal 1997             | NRT                   | Nicotine nasal spray                   | Placebo | <ul style="list-style-type: none"> <li>current abuse of alcohol or other drugs</li> </ul>                                                                                                                                                                                                                                                                                                                                   | Yes | Conditionally include |
| Br Thor Society 1983     | NRT                   | nicotine chewing gum                   | Placebo | <ul style="list-style-type: none"> <li>psychiatric disorder contraindicating smoking withdrawal</li> </ul>                                                                                                                                                                                                                                                                                                                  | No  | Unclear               |

|                      |     |                                      |            |                                                                                                                                                                                                                             |     |                       |
|----------------------|-----|--------------------------------------|------------|-----------------------------------------------------------------------------------------------------------------------------------------------------------------------------------------------------------------------------|-----|-----------------------|
| Buchkremer 1988      | NRT | Nicotine patch + behavioural therapy | Placebo    | <ul style="list-style-type: none"> <li>not reported</li> </ul>                                                                                                                                                              | No  | Unclear               |
| Campbell 1987        | NRT | Nicotine gum (2 mg)                  | Placebo    | <ul style="list-style-type: none"> <li>not reported</li> </ul>                                                                                                                                                              | No  | Unclear               |
| Campbell 1991        | NRT | Nicotine gum 2 to 4 mg               | Placebo    | <ul style="list-style-type: none"> <li>organic psychosis</li> <li>drug and alcohol abuse</li> </ul>                                                                                                                         | Yes | Conditionally include |
| Campbell 1996        | NRT | Nicotine patch (21 mg)               | Placebo    | <ul style="list-style-type: none"> <li>mental disturbances</li> </ul>                                                                                                                                                       | Yes | Explicitly exclude    |
| Cinciripini 1996     | NRT | Nicotine patch (21 mg)               | No Placebo | <ul style="list-style-type: none"> <li>uncontrolled systemic illnesses</li> <li>recent history (within 1 year) of diagnosed major depression or treatment with antidepressants</li> </ul>                                   | Yes | Conditionally include |
| Clavel 1985          | NRT | Nicotine gum                         | No Placebo | <ul style="list-style-type: none"> <li>not reported</li> </ul>                                                                                                                                                              | No  | Unclear               |
| Clavel-Chapelon 1992 | NRT | Nicotine gum                         | Placebo    | <ul style="list-style-type: none"> <li>not reported</li> </ul>                                                                                                                                                              | No  | Unclear               |
| Coleman 2012         | NRT | Nicotine patch                       | Placebo    | <ul style="list-style-type: none"> <li>chemical or alcohol dependence</li> </ul>                                                                                                                                            | Yes | Conditionally include |
| Cooper 2005          | NRT | Nicotine gum                         | Placebo    | <ul style="list-style-type: none"> <li>currently taking antidepressant medication or receiving psychiatric or alcohol/drug abuse treatment.</li> <li>history of depression still in treatment</li> </ul>                    | Yes | Conditionally include |
| Cummins 2016         | NRT | Nicotine patch                       | No Placebo | <ul style="list-style-type: none"> <li>not enough information provided</li> </ul>                                                                                                                                           | No  | Unclear               |
| Cunningham 2016      | NRT | Nicotine patch                       | No Placebo | <ul style="list-style-type: none"> <li>not reported</li> </ul>                                                                                                                                                              | No  | Unclear               |
| Daughton 1991        | NRT | Nicotine patch                       | Placebo    | <ul style="list-style-type: none"> <li>not reported</li> </ul>                                                                                                                                                              | No  | Unclear               |
| Daughton 1998        | NRT | Nicotine patch                       | Placebo    | <ul style="list-style-type: none"> <li>current use of psychotropic drugs</li> <li>recent history of drug or alcohol abuse (within 1 year of the study)</li> </ul>                                                           | Yes | Conditionally include |
| Davidson 1998        | NRT | Nicotine patch                       | Placebo    | <ul style="list-style-type: none"> <li>not reported</li> </ul>                                                                                                                                                              | No  | Unclear               |
| Ehram 1991           | NRT | Nicotine patch                       | Placebo    | <ul style="list-style-type: none"> <li>not reported</li> </ul>                                                                                                                                                              | No  | Unclear               |
| Fagerström 1982      | NRT | Nicotine gum                         | Placebo    | <ul style="list-style-type: none"> <li>not reported</li> </ul>                                                                                                                                                              | No  | Unclear               |
| Fagerström 1984      | NRT | Nicotine gum                         | No Placebo | <ul style="list-style-type: none"> <li>psychologically imbalanced or in the midst of a crisis</li> </ul>                                                                                                                    | Yes | Conditionally include |
| Fee 1982             | NRT | Nicotine gum                         | Placebo    | <ul style="list-style-type: none"> <li>not reported</li> </ul>                                                                                                                                                              | No  | Unclear               |
| Fiore 1994a          | NRT | Nicotine patch                       | Placebo    | <ul style="list-style-type: none"> <li>regular use of psychotropic drugs</li> <li>current symptomatic psychiatric disorder</li> <li>alcohol or other drug abuse</li> </ul>                                                  | Yes | Explicitly exclude    |
| Fiore 1994b          | NRT | Nicotine patch                       | Placebo    | <ul style="list-style-type: none"> <li>regular use of psychotropic drugs</li> <li>alcohol or drug abuse; chronic dermatologic disorders</li> <li>current symptomatic psychiatric disorder</li> </ul>                        | Yes | Explicitly exclude    |
| Fortmann 1995        | NRT | Nicotine gum                         | No Placebo | <ul style="list-style-type: none"> <li>not reported</li> </ul>                                                                                                                                                              | No  | Unclear               |
| Fraser 2014          | NRT | Nicotine lozenge                     | No Placebo | <ul style="list-style-type: none"> <li>not reported</li> </ul>                                                                                                                                                              | No  | Unclear               |
| Gallagher 2007       | NRT | NRT patch                            | No Placebo | <ul style="list-style-type: none"> <li>acute decompensation/exacerbation of psychiatric symptomatology that precluded the ability to participate,</li> <li>active, significant substance use in the last 30 days</li> </ul> | Yes | Conditionally include |
| Garvey 2000          | NRT | Nicotine gum                         | Placebo    | <ul style="list-style-type: none"> <li>not reported</li> </ul>                                                                                                                                                              | No  | Unclear               |

|                   |     |                            |            |                                                                                                                                                                                                                                 |     |                       |
|-------------------|-----|----------------------------|------------|---------------------------------------------------------------------------------------------------------------------------------------------------------------------------------------------------------------------------------|-----|-----------------------|
| Gilbert 1989      | NRT | Nicotine gum               | No Placebo | <ul style="list-style-type: none"> <li>not reported</li> </ul>                                                                                                                                                                  | No  | Unclear               |
| Glavas 2003       | NRT | Nicotine patch             | Placebo    | <ul style="list-style-type: none"> <li>drug dependence</li> <li>major psychiatric disorders</li> </ul>                                                                                                                          | Yes | Conditionally include |
| Glover 2002       | NRT | Nicotine sublingual tablet | Placebo    | <ul style="list-style-type: none"> <li>regular use of psychotropic medication</li> <li>alcohol or any other drug abuse during the previous 12 months</li> </ul>                                                                 | Yes | Conditionally include |
| Graham 2017       | NRT | Nicotine patch             | No Placebo | <ul style="list-style-type: none"> <li>not reported</li> </ul>                                                                                                                                                                  | No  | Unclear               |
| Gross 1995        | NRT | Nicotine gum               | No Placebo | <ul style="list-style-type: none"> <li>not reported</li> </ul>                                                                                                                                                                  | No  | Unclear               |
| Hall 1985         | NRT | Nicotine gum               | No Placebo | <ul style="list-style-type: none"> <li>not reported</li> </ul>                                                                                                                                                                  | No  | Unclear               |
| Hall 1987         | NRT | Nicotine gum               | Placebo    | <ul style="list-style-type: none"> <li>not reported</li> </ul>                                                                                                                                                                  | No  | Unclear               |
| Hall 1996         | NRT | Nicotine gum               | Placebo    | <ul style="list-style-type: none"> <li>current major depression</li> </ul>                                                                                                                                                      | Yes | Conditionally include |
| Hand 2002         | NRT | Nicotine patch + inhaler   | No Placebo | <ul style="list-style-type: none"> <li>alcoholism, drug dependency</li> <li>active psychiatric illness</li> </ul>                                                                                                               | Yes | Explicitly exclude    |
| Harackiewicz 1988 | NRT | Nicotine Gum               | No Placebo | <ul style="list-style-type: none"> <li>not reported</li> </ul>                                                                                                                                                                  | No  | Unclear               |
| Hasan 2014        | NRT | Patch and gum              | No Placebo | <ul style="list-style-type: none"> <li>history of substance abuse</li> <li>major psychiatric disorder included schizophrenia, bipolar and personality disorders</li> </ul>                                                      | Yes | Conditionally include |
| Hays 1999         | NRT | Nicotine patch             | Placebo    | <ul style="list-style-type: none"> <li>not reported</li> </ul>                                                                                                                                                                  | No  | Unclear               |
| Herrera 1995      | NRT | Nicotine Gum               | Placebo    | <ul style="list-style-type: none"> <li>use of any psychotropic medications</li> <li>abuse alcohol or any other drugs</li> </ul>                                                                                                 | Yes | Conditionally include |
| Heydari 2012      | NRT | Nicotine patch             | No Placebo | <ul style="list-style-type: none"> <li>not reported</li> </ul>                                                                                                                                                                  | No  | Unclear               |
| Heydari 2013      | NRT | Patch, Gum and Lozenges    | No Placebo | <ul style="list-style-type: none"> <li>mental or physical illness</li> </ul>                                                                                                                                                    | Yes | Explicitly exclude    |
| Hjalmarson 1984   | NRT | Nicotine gum               | Placebo    | <ul style="list-style-type: none"> <li>psychosis, mental retardation, and alcohol abuse</li> </ul>                                                                                                                              | Yes | Conditionally include |
| Hjalmarson 1994   | NRT | Nicotine nasal spray       | Placebo    | <ul style="list-style-type: none"> <li>current use of any psychotropic medication</li> <li>current abuse of alcohol or any other drug</li> </ul>                                                                                | Yes | Conditionally include |
| Hjalmarson 1997   | NRT | Nicotine inhaler           | Placebo    | <ul style="list-style-type: none"> <li>regular treatment with psychotropic drugs</li> <li>abuse of alcohol or any other drugs during the last 12 months</li> </ul>                                                              | Yes | Conditionally include |
| Huber 1988        | NRT | Nicotine gum               | No Placebo | <ul style="list-style-type: none"> <li>not reported</li> </ul>                                                                                                                                                                  | No  | Unclear               |
| Hughes 1989       | NRT | Nicotine gum               | Placebo    | <ul style="list-style-type: none"> <li>not reported</li> </ul>                                                                                                                                                                  | No  | Unclear               |
| Hughes 1990       | NRT | Nicotine gum               | Placebo    | <ul style="list-style-type: none"> <li>contraindication to nicotine gum</li> <li>history of drug abuse, drug dependence</li> <li>history of psychiatric disorder</li> </ul>                                                     | Yes | Explicitly exclude    |
| Hughes 1999       | NRT | Nicotine Patch             | Placebo    | <ul style="list-style-type: none"> <li>use of psychotropic</li> </ul>                                                                                                                                                           | Yes | Conditionally include |
| Hughes 2003       | NRT | Nicotine patch             | Placebo    | <ul style="list-style-type: none"> <li>past alcohol dependence but no alcohol or illicit drug intake for last 30 days</li> <li>current major psychiatric disorder and not taking a psychoactive medication</li> </ul>           | Yes | Conditionally include |
| Hurt 1990         | NRT | Nicotine patch             | Placebo    | <ul style="list-style-type: none"> <li>not reported</li> </ul>                                                                                                                                                                  | No  | Unclear               |
| Hurt 1994         | NRT | Nicotine patch             | Placebo    | <ul style="list-style-type: none"> <li>active chemical dependence on alcohol</li> <li>current psychiatric disorder,</li> <li>current use of clonidine, buspirone hydrochloride, doxepin hydrochloride, or fluoxetine</li> </ul> | Yes | Explicitly exclude    |
| ICRF 1994         | NRT | Nicotine patch             | Placebo    | <ul style="list-style-type: none"> <li>not reported</li> </ul>                                                                                                                                                                  | No  | Unclear               |
| Jamrozik 1984     | NRT | Nicotine gum               | Placebo    | <ul style="list-style-type: none"> <li>not reported</li> </ul>                                                                                                                                                                  | No  | Unclear               |
| Jarvis 1982       | NRT | Nicotine gum               | Placebo    | <ul style="list-style-type: none"> <li>not reported</li> </ul>                                                                                                                                                                  | No  | Unclear               |

|                |     |                         |            |                                                                                                                                                                                                                                                                                                                                                                                                                                                                                      |     |                       |
|----------------|-----|-------------------------|------------|--------------------------------------------------------------------------------------------------------------------------------------------------------------------------------------------------------------------------------------------------------------------------------------------------------------------------------------------------------------------------------------------------------------------------------------------------------------------------------------|-----|-----------------------|
| Jensen 1991    | NRT | Nicotine gum            | Placebo    | <ul style="list-style-type: none"> <li>not reported</li> </ul>                                                                                                                                                                                                                                                                                                                                                                                                                       | No  | Unclear               |
| Jorenby 1999   | NRT | Nicotine patch          | Placebo    | <ul style="list-style-type: none"> <li>current diagnosis of major depressive episode</li> <li>history of panic disorder, psychosis, bipolar disorder, or eating disorders</li> <li>abuse of alcohol or a non-nicotine-containing drug within the preceding year</li> <li>use of a psychoactive drug within the week before enrolment</li> <li>clinical depression</li> </ul>                                                                                                         | Yes | Conditionally include |
| Joseph 1996    | NRT | Nicotine patch          | Placebo    | <ul style="list-style-type: none"> <li>presence of unstable psychiatric illness</li> <li>unstable disorder involving the use of alcohol or controlled substances</li> </ul>                                                                                                                                                                                                                                                                                                          | Yes | Conditionally include |
| Killen 1984    | NRT | Nicotine gum            | No Placebo | <ul style="list-style-type: none"> <li>not reported</li> </ul>                                                                                                                                                                                                                                                                                                                                                                                                                       | No  | Unclear               |
| Killen 1990    | NRT | Nicotine gum            | No Placebo | <ul style="list-style-type: none"> <li>not reported</li> </ul>                                                                                                                                                                                                                                                                                                                                                                                                                       | No  | Unclear               |
| Killen 1997    | NRT | Nicotine patch          | Placebo    | <ul style="list-style-type: none"> <li>not reported</li> </ul>                                                                                                                                                                                                                                                                                                                                                                                                                       | No  | Unclear               |
| Kornitzer 1995 | NRT | Nicotine patch          | Placebo    | <ul style="list-style-type: none"> <li>regular use of psychotropic medication</li> <li>abuse of alcohol or any other drug</li> </ul>                                                                                                                                                                                                                                                                                                                                                 | Yes | Conditionally include |
| Kralikova 2009 | NRT | Nicotine gum or inhaler | Placebo    | <ul style="list-style-type: none"> <li>psychiatric treatment or use of medication</li> <li>alcohol or other drug problems</li> </ul>                                                                                                                                                                                                                                                                                                                                                 | Yes | Conditionally include |
| Leischow 1996  | NRT | Nicotine Inhaler        | Placebo    | <ul style="list-style-type: none"> <li>regular use of psychotropic drugs</li> <li>alcohol or drug abuse</li> </ul>                                                                                                                                                                                                                                                                                                                                                                   | Yes | Conditionally include |
| Lerman 2015    | NRT | Nicotine patch          | Placebo    | <ul style="list-style-type: none"> <li>history of substance misuse treatment</li> <li>current use of cocaine or methamphetamine, or more than 25 alcoholic drinks per week</li> <li>history of DSM-IV Axis 1 psychiatric disorder</li> <li>suicide risk score on the MINI International Neuropsychiatric Interview (MINI) of more than 1</li> <li>current major depression; current use of antipsychotics (e.g., monoamine oxidase inhibitors, tricyclic antidepressants)</li> </ul> | Yes | Conditionally include |
| Lewis 1998     | NRT | Nicotine patch          | Placebo    | <ul style="list-style-type: none"> <li>drug and alcohol abuse within 6 month of admission</li> <li>history of major psychiatric illnesses</li> </ul>                                                                                                                                                                                                                                                                                                                                 | Yes | Conditionally include |
| Malcolm 1980   | NRT | Nicotine gum            | Placebo    | <ul style="list-style-type: none"> <li>not reported</li> </ul>                                                                                                                                                                                                                                                                                                                                                                                                                       | No  | Unclear               |
| McGovern 1992  | NRT | Nicotine gum            | Placebo    | <ul style="list-style-type: none"> <li>not reported</li> </ul>                                                                                                                                                                                                                                                                                                                                                                                                                       | No  | Unclear               |
| Molyneux 2003  | NRT | Choice of NRT           | No Placebo | <ul style="list-style-type: none"> <li>admission for psychiatric care</li> <li>history of alcohol and/or illicit drug abuse in the last 12 months</li> </ul>                                                                                                                                                                                                                                                                                                                         | Yes | Conditionally include |
| Moolchan 2005  | NRT | Nicotine patch + gum    | Placebo    | <ul style="list-style-type: none"> <li>drug or alcohol dependence other than nicotine</li> <li>current mania, psychosis, and acute depression</li> </ul>                                                                                                                                                                                                                                                                                                                             | Yes | Conditionally include |
| NCT00534404    | NRT | Nicotine patch          | No Placebo | <ul style="list-style-type: none"> <li>not reported</li> </ul>                                                                                                                                                                                                                                                                                                                                                                                                                       | No  | Unclear               |
| Nebot 1992     | NRT | Nicotine gum            | No Placebo | <ul style="list-style-type: none"> <li>addiction to legal or illegal drugs</li> </ul>                                                                                                                                                                                                                                                                                                                                                                                                | Yes | Conditionally include |
| Niaura 1994    | NRT | Nicotine gum            | No Placebo | <ul style="list-style-type: none"> <li>not reported</li> </ul>                                                                                                                                                                                                                                                                                                                                                                                                                       | No  | Unclear               |
| Niaura 1999    | NRT | Nicotine gum            | No Placebo | <ul style="list-style-type: none"> <li>treatment for any psychiatric disorder in the past year</li> <li>using recreational drugs</li> </ul>                                                                                                                                                                                                                                                                                                                                          | Yes | Explicitly exclude    |
| Ockene 1991    | NRT | Nicotine gum            | No Placebo | <ul style="list-style-type: none"> <li>not reported</li> </ul>                                                                                                                                                                                                                                                                                                                                                                                                                       | No  | Unclear               |
| Oncken 2007    | NRT | Nicotine patch          | Placebo    | <ul style="list-style-type: none"> <li>Axis I psychiatric diagnosis that required clinical attention (e.g., current major depression or substance dependence other than nicotine)</li> <li>chronic treatment with bupropion for depression was not exclusionary</li> </ul>                                                                                                                                                                                                           | Yes | Conditionally include |
| Oncken 2008    | NRT | Nicotine gum            | Placebo    | <ul style="list-style-type: none"> <li>evidence of cognitive or mental health problems (e.g., diagnosis of mental disorder in chart or interviewer or support specialist suspected problems)</li> </ul>                                                                                                                                                                                                                                                                              | Yes | Explicitly exclude    |

|                      |     |                              |            |                                                                                                                                                                                                                                                                                          |     |                       |
|----------------------|-----|------------------------------|------------|------------------------------------------------------------------------------------------------------------------------------------------------------------------------------------------------------------------------------------------------------------------------------------------|-----|-----------------------|
|                      |     |                              |            | <ul style="list-style-type: none"> <li>evidence of possible drug or alcohol addiction</li> </ul>                                                                                                                                                                                         |     |                       |
| Ortega 2011          | NRT | Nicotine patch or gum        | No Placebo | <ul style="list-style-type: none"> <li>pathologies related to psychiatry or neurology</li> </ul>                                                                                                                                                                                         | Yes | Explicitly exclude    |
| Otero 2006           | NRT | Nicotine patch               | No Placebo | <ul style="list-style-type: none"> <li>lifetime mental disorders</li> <li>alcohol and other drugs dependence</li> </ul>                                                                                                                                                                  | Yes | Explicitly exclude    |
| Page 1986            | NRT | Nicotine Gum                 | No Placebo | <ul style="list-style-type: none"> <li>not reported</li> </ul>                                                                                                                                                                                                                           | No  | Unclear               |
| Paoletti 1996        | NRT | Nicotine patch               | Placebo    | <ul style="list-style-type: none"> <li>past or current history of psychiatric disorders</li> <li>currently taking daily psychiatric medications</li> </ul>                                                                                                                               | Yes | Explicitly exclude    |
| Piper 2009           | NRT | Choice of NRT/Bupropion      | Placebo    | <ul style="list-style-type: none"> <li>current psychosis or schizophrenia diagnosis</li> <li>contraindications for any of the study medications</li> <li>high alcohol consumption (6 drinks per day on 6 or 7 days of the week)</li> <li>bipolar disorder, an eating disorder</li> </ul> | Yes | Conditionally include |
| Pirie 1992           | NRT | Nicotine Gum                 | No Placebo | <ul style="list-style-type: none"> <li>substance abuse in the past 6 months</li> </ul>                                                                                                                                                                                                   | Yes | Conditionally include |
| Pollak 2007          | NRT | Nicotine patch, gum, lozenge | No Placebo | <ul style="list-style-type: none"> <li>cognitive or mental health problems (e.g., diagnosis of mental disorder in chart or interviewer or support specialist suspected problems)</li> <li>possible drug or alcohol addiction</li> </ul>                                                  | Yes | Explicitly exclude    |
| Prapavessis 2007     | NRT | Nicotine patch               | No Placebo | <ul style="list-style-type: none"> <li>psychological problems"</li> </ul>                                                                                                                                                                                                                | Yes | Explicitly exclude    |
| Puska 1979           | NRT | Nicotine gum                 | Placebo    | <ul style="list-style-type: none"> <li>not reported</li> </ul>                                                                                                                                                                                                                           | No  | Unclear               |
| Richmond 1993        | NRT | Nicotine gum                 | No Placebo | <ul style="list-style-type: none"> <li>not reported</li> </ul>                                                                                                                                                                                                                           | No  | Unclear               |
| Richmond 1994        | NRT | Nicotine patch               | Placebo    | <ul style="list-style-type: none"> <li>not reported</li> </ul>                                                                                                                                                                                                                           | No  | Unclear               |
| Russell 1983         | NRT | Nicotine gum                 | No Placebo | <ul style="list-style-type: none"> <li>not reported</li> </ul>                                                                                                                                                                                                                           | No  | Unclear               |
| Sachs 1993           | NRT | Nicotine patch               | Placebo    | <ul style="list-style-type: none"> <li>current regular use of psychotropic medications</li> <li>current or past alcohol or other drug abuse</li> </ul>                                                                                                                                   | Yes | Conditionally include |
| Scherphof 2014       | NRT | Nicotine patch               | Placebo    | <ul style="list-style-type: none"> <li>not reported</li> </ul>                                                                                                                                                                                                                           | No  | Unclear               |
| Schneider 1983a      | NRT | Nicotine gum                 | Placebo    | <ul style="list-style-type: none"> <li>not reported</li> </ul>                                                                                                                                                                                                                           | No  | Unclear               |
| Schneider 1983b      | NRT | Nicotine gum                 | Placebo    | <ul style="list-style-type: none"> <li>not reported</li> </ul>                                                                                                                                                                                                                           | No  | Unclear               |
| Schneider 1995       | NRT | Nicotine nasal spray         | Placebo    | <ul style="list-style-type: none"> <li>use of psychoactive medication</li> <li>past or current drug abuse</li> <li>psychiatric conditions</li> </ul>                                                                                                                                     | Yes | Explicitly exclude    |
| Schneider 1996       | NRT | Nicotine inhaler             | Placebo    | <ul style="list-style-type: none"> <li>psychiatric conditions or diagnoses</li> <li>psychoactive medication</li> <li>past or current drug abuse</li> </ul>                                                                                                                               | Yes | Explicitly exclude    |
| Segnan 1991          | NRT | Nicotine gum                 | No Placebo | <ul style="list-style-type: none"> <li>not reported</li> </ul>                                                                                                                                                                                                                           | No  | Unclear               |
| Shiffman 2002 (2 mg) | NRT | Nicotine lozenge             | Placebo    | <ul style="list-style-type: none"> <li>not reported</li> </ul>                                                                                                                                                                                                                           | No  | Unclear               |
| Shiffman 2002 (4 mg) | NRT | Nicotine lozenge             | Placebo    | <ul style="list-style-type: none"> <li>not reported</li> </ul>                                                                                                                                                                                                                           | No  | Unclear               |
| Shiffman 2009 (2 mg) | NRT | Nicotine gum                 | Placebo    | <ul style="list-style-type: none"> <li>not reported</li> </ul>                                                                                                                                                                                                                           | No  | Unclear               |
| Shiffman 2009 (4 mg) | NRT | Nicotine gum                 | Placebo    | <ul style="list-style-type: none"> <li>not reported</li> </ul>                                                                                                                                                                                                                           | No  | Unclear               |
| Stapleton 1995       | NRT | Nicotine patch               | Placebo    | <ul style="list-style-type: none"> <li>current psychotropic medication</li> </ul>                                                                                                                                                                                                        | Yes | Conditionally include |

|                 |       |                             |               |                                                                                                                                                                                                                                                                                                                                                  |     |                       |
|-----------------|-------|-----------------------------|---------------|--------------------------------------------------------------------------------------------------------------------------------------------------------------------------------------------------------------------------------------------------------------------------------------------------------------------------------------------------|-----|-----------------------|
| Stein 2013      | NRT   | Nicotine patch + gum        | Placebo       | <ul style="list-style-type: none"> <li>self-reported psychiatric history</li> </ul>                                                                                                                                                                                                                                                              | Yes | Explicitly exclude    |
| Sutherland 1992 | NRT   | Nicotine nasal spray        | Placebo       | <ul style="list-style-type: none"> <li>current use of psychotropic medication</li> <li>current abuse of alcohol or other drugs</li> </ul>                                                                                                                                                                                                        | Yes | Conditionally include |
| Sønderskov 1997 | NRT   | Nicotine patch              | Placebo       | <ul style="list-style-type: none"> <li>not reported</li> </ul>                                                                                                                                                                                                                                                                                   | No  | Unclear               |
| TNSG 1991       | NRT   | Nicotine patch              | Placebo       | <ul style="list-style-type: none"> <li>not reported</li> </ul>                                                                                                                                                                                                                                                                                   | No  | Unclear               |
| Tuisku 2016     | NRT   | Nicotine patch              | Placebo       | <ul style="list-style-type: none"> <li>current drug or alcohol abuse</li> </ul>                                                                                                                                                                                                                                                                  | Yes | Conditionally include |
| Tønnesen 1988   | NRT   | Nicotine gum                | Placebo       | <ul style="list-style-type: none"> <li>alcohol abuse</li> <li>major psychiatric disorders</li> </ul>                                                                                                                                                                                                                                             | Yes | Conditionally include |
| Tønnesen 1991   | NRT   | Nicotine patch              | Placebo       | <ul style="list-style-type: none"> <li>regular use of psychiatric drugs</li> <li>alcohol or drug abuse</li> </ul>                                                                                                                                                                                                                                | Yes | Conditionally include |
| Tønnesen 1993   | NRT   | Nicotine inhaler            | Placebo       | <ul style="list-style-type: none"> <li>regular use of psychotropic drugs</li> <li>abuse of alcohol or any other drugs</li> </ul>                                                                                                                                                                                                                 | Yes | Conditionally include |
| Tønnesen 2000   | NRT   | Nicotine patch              | Placebo       | <ul style="list-style-type: none"> <li>regular use of psychotropic drugs</li> <li>abuse of alcohol or any other drugs</li> </ul>                                                                                                                                                                                                                 | Yes | Conditionally include |
| Tønnesen 2006   | NRT   | Nicotine lozenges           | Placebo       | <ul style="list-style-type: none"> <li>not reported</li> </ul>                                                                                                                                                                                                                                                                                   | No  | Unclear               |
| Tønnesen 2012   | NRT   | Nicotine spray              | Placebo       | <ul style="list-style-type: none"> <li>suspected alcohol or drug abuse</li> <li>psychiatric condition</li> </ul>                                                                                                                                                                                                                                 | Yes | Explicitly exclude    |
| Wallstrom 2000  | NRT   | Nicotine lozenges           | Placebo       | <ul style="list-style-type: none"> <li>use of psychotropic medication</li> </ul>                                                                                                                                                                                                                                                                 | Yes | Conditionally include |
| Ward 2013       | NRT   | Nicotine patch              | Placebo       | <ul style="list-style-type: none"> <li>not reported</li> </ul>                                                                                                                                                                                                                                                                                   | No  | Unclear               |
| Westman 1993    | NRT   | Nicotine patch              | Placebo       | <ul style="list-style-type: none"> <li>major psychiatric disorders requiring medication</li> </ul>                                                                                                                                                                                                                                               | Yes | Conditionally include |
| Wisborg 2000    | NRT   | Nicotine patch              | Placebo       | <ul style="list-style-type: none"> <li>not reported</li> </ul>                                                                                                                                                                                                                                                                                   | No  | Unclear               |
| Zelman 1992     | NRT   | Nicotine gum                | No Placebo    | <ul style="list-style-type: none"> <li>not reported</li> </ul>                                                                                                                                                                                                                                                                                   | No  | Unclear               |
| Baltieri 2009   | Other | Naltrexone                  | Placebo       | <ul style="list-style-type: none"> <li>current diagnosis of dependence or abuse of other substances except nicotine</li> <li>concomitant psychiatric disorders that might require specific drug treatment</li> <li>clinical history of mental retardation</li> </ul>                                                                             | Yes | Conditionally include |
| Covey 1999      | Other | Naltrexone                  | Placebo       | <ul style="list-style-type: none"> <li>current psychiatric disorder including major depression</li> <li>drugs or alcohol abuse or dependence</li> <li>history of a psychotic illness</li> </ul>                                                                                                                                                  | Yes | Conditionally include |
| King 2006       | Other | Naltrexone + Nicotine Patch | Placebo + NRT | <ul style="list-style-type: none"> <li>current or recent past major medical or psychiatric disorder</li> <li>use of psychotropic medications in the previous year</li> </ul>                                                                                                                                                                     | Yes | Explicitly exclude    |
| King 2012       | Other | Naltrexone + Nicotine Patch | Placebo + NRT | <ul style="list-style-type: none"> <li>past-year history of a major medical or psychiatric disorder</li> <li>substance dependence (except nicotine)</li> <li>lifetime diagnosis of opioid abuse or dependence</li> <li>use of opioids psychotropic medications</li> </ul>                                                                        | Yes | Explicitly exclude    |
| O'Malley 2006   | Other | Naltrexone + Nicotine Patch | Placebo       | <ul style="list-style-type: none"> <li>past-year history of a major medical or psychiatric disorder</li> <li>substance dependence (except nicotine)</li> <li>lifetime diagnosis of opioid abuse or dependence</li> <li>use of opioids psychotropic medications</li> </ul>                                                                        | Yes | Conditionally include |
| Toll 2010a      | Other | Naltrexone                  | Placebo       | <ul style="list-style-type: none"> <li>current alcohol or drug dependence other than nicotine dependence</li> <li>serious current neurologic, psychiatric, suicidal risk or medical illness</li> <li>use of any psychotropic drug or on any drug with a psychotropic component [except those who were on a stable dose of a Selective</li> </ul> | Yes | Explicitly exclude    |

|                                                                      |                 |                                                        |                                      |                                                                                                                                                                                                                                                                                                                                                                                                                             |     |                       |
|----------------------------------------------------------------------|-----------------|--------------------------------------------------------|--------------------------------------|-----------------------------------------------------------------------------------------------------------------------------------------------------------------------------------------------------------------------------------------------------------------------------------------------------------------------------------------------------------------------------------------------------------------------------|-----|-----------------------|
|                                                                      |                 |                                                        |                                      | Serotonin Reuptake Inhibitor for at least 2 months for the indications of Major Depressive Disorder, Premenstrual Syndrome or Premenstrual Dysphoric Disorder]                                                                                                                                                                                                                                                              |     |                       |
| Wong 1999                                                            | Other           | Naltrexone                                             | Placebo                              | <ul style="list-style-type: none"> <li>contraindication for the use of either naltrexone or nicotine patch therapy</li> <li>history of depression, were currently depressed</li> <li>had other psychiatric conditions requiring medication</li> </ul>                                                                                                                                                                       | Yes | Conditionally include |
| STRATUS-EU 2006                                                      | Other           | (i) Rimonabant 5 mg<br>(ii) Rimonabant 20 mg           | Placebo                              | <ul style="list-style-type: none"> <li>not reported</li> </ul>                                                                                                                                                                                                                                                                                                                                                              | No  | Unclear               |
| STRATUS-US 2006                                                      | Other           | (i) Rimonabant 5 mg<br>(ii) Rimonabant 20 mg           | Placebo                              | <ul style="list-style-type: none"> <li>not reported</li> </ul>                                                                                                                                                                                                                                                                                                                                                              | No  | Unclear               |
| STRATUS-WW 2005                                                      | Other           | (i) Rimonabant 5 mg<br>(ii) Rimonabant 20 mg           | Placebo                              | <ul style="list-style-type: none"> <li>not reported</li> </ul>                                                                                                                                                                                                                                                                                                                                                              | No  | Unclear               |
| Hymowitz 1996                                                        | Other           | 2.5mg silver acetate lozenge                           | Placebo                              | <ul style="list-style-type: none"> <li>not reported</li> </ul>                                                                                                                                                                                                                                                                                                                                                              | No  | Unclear               |
| Jensen 1990                                                          | Other           | 6mg Silver acetate chewing gum, up to six pieces daily | Placebo + NRT                        | <ul style="list-style-type: none"> <li>not reported</li> </ul>                                                                                                                                                                                                                                                                                                                                                              | No  | Unclear               |
| Following studies are included after search updated in December 2020 |                 |                                                        |                                      |                                                                                                                                                                                                                                                                                                                                                                                                                             |     |                       |
| Barnes 2006                                                          | Antidepressants | St John's Wort, 300 mg per day                         | St John's Wort, 300 mg twice per day | <ul style="list-style-type: none"> <li>history of dependence on alcohol or a non-nicotine substance within the past year</li> <li>current diagnosis of major depressive episode</li> <li>history of panic disorder, psychosis, bipolar disorder or eating disorders</li> <li>current use of antidepressant agents</li> </ul>                                                                                                | Yes | Conditionally include |
| Benli 2017                                                           | Antidepressants | Bupropion                                              | Varenicline                          | <ul style="list-style-type: none"> <li>current treatment for previously known psychiatric disease</li> </ul>                                                                                                                                                                                                                                                                                                                | Yes | Explicitly exclude    |
| Cinciripini 2018                                                     | Antidepressants | Bupropion                                              | Varenicline                          | <ul style="list-style-type: none"> <li>currently taking psychotropic medication</li> <li>having a current psychiatric disorder, psychiatric hospitalization within the last year</li> <li>life-time history of a psychotic disorder</li> <li>scoring moderate or higher on the suicidality scale of the Mini International Neuropsychiatric Interview (MINI)</li> </ul>                                                     | Yes | Explicitly exclude    |
| CTRI/2013/07/003830                                                  | Antidepressants | Bupropion                                              | No Placebo                           | <ul style="list-style-type: none"> <li>past psychiatric illness"</li> </ul>                                                                                                                                                                                                                                                                                                                                                 | Yes | Conditionally include |
| Ebbert 2014                                                          | Antidepressants | Bupropion                                              | Varenicline                          | <ul style="list-style-type: none"> <li>history of psychosis, bipolar disorder, bulimia, or anorexia nervosa</li> <li>current depression (moderate or severe)</li> <li>active substance abuse other than nicotine</li> <li>current use (previous 14 days) of antipsychotics, monoamine oxidase inhibitors, or drugs with bupropion SR interactions</li> <li>recent antidepressant dose change (previous 3 months)</li> </ul> | Yes | Conditionally include |
| Gilbert 2019                                                         | Antidepressants | Bupropion                                              | Placebo                              | <ul style="list-style-type: none"> <li>current use of psychoactive drugs or medications</li> </ul>                                                                                                                                                                                                                                                                                                                          | Yes | Conditionally include |

|                     |                 |            |             |                                                                                                                                                                                                                                                                                                                                                                                                                                                                                                                                                                                                                     |     |                       |
|---------------------|-----------------|------------|-------------|---------------------------------------------------------------------------------------------------------------------------------------------------------------------------------------------------------------------------------------------------------------------------------------------------------------------------------------------------------------------------------------------------------------------------------------------------------------------------------------------------------------------------------------------------------------------------------------------------------------------|-----|-----------------------|
|                     |                 |            |             | <ul style="list-style-type: none"> <li>• alcohol use 28 alcoholic drinks per week</li> <li>• bulimia or anorexia</li> <li>• current diagnoses of a mood, bipolar, or psychotic disorder</li> </ul>                                                                                                                                                                                                                                                                                                                                                                                                                  |     |                       |
| Moreno-Coutino 2015 | Antidepressants | Bupropion  | NRT         | <ul style="list-style-type: none"> <li>• use or abuse of another psychoactive substance (including psychiatric medications)</li> <li>• diagnosis of mental disorders and conditions</li> <li>• contraindications to bupropion</li> </ul>                                                                                                                                                                                                                                                                                                                                                                            | Yes | Explicitly exclude    |
| NCT00132821         | Antidepressants | Bupropion  | NRT         | <ul style="list-style-type: none"> <li>• met DSM-IV criteria for dependence on substances other than nicotine and caffeine</li> <li>• substance abuse within the year prior to enrolment</li> <li>• history of DSM-IV diagnosis of schizophrenia, bipolar disorder, obsessive compulsive disorder, or chronic depression</li> <li>• current diagnosis of major depression</li> <li>• currently diagnosed with a sleep disorder, anorexia or bulimia</li> <li>• use of medications contraindicated with bupropion</li> <li>• high frequency alcohol use or binge drinking in the month prior to enrolment</li> </ul> | Yes | Conditionally include |
| NCT00308763         | Antidepressants | Bupropion  | NRT         | <ul style="list-style-type: none"> <li>• history of substance abuse, including alcohol use in excess of 14 drinks a week</li> <li>• history of anorexia or bulimia</li> <li>• presence of an unstable psychiatric illness</li> <li>• current use of a psychotropic medication, including antidepressant medications</li> </ul>                                                                                                                                                                                                                                                                                      | Yes | Conditionally include |
| NCT00578669         | Antidepressants | Fluoxetine | Placebo     | <ul style="list-style-type: none"> <li>• current Axis I disorder, including Major Depressive Disorder</li> <li>• psychoactive substance abuse or dependence within past year</li> <li>• current use of psychotropic medication</li> <li>• use of antidepressant medication within past 6 months</li> <li>• current suicidal risk</li> </ul>                                                                                                                                                                                                                                                                         | Yes | Explicitly exclude    |
| Rose 2014           | Antidepressants | Bupropion  | Varenicline | <ul style="list-style-type: none"> <li>• not reported</li> </ul>                                                                                                                                                                                                                                                                                                                                                                                                                                                                                                                                                    | No  | Unclear               |
